# Supplementary material
Source: PubMed Central journal article supplement (PMC7684764)
Supplement: NIHMS1644660-supplement-Supporting_Information.pdf [file NIHMS1644660-supplement-Supporting_Information.pdf]

## SUPPORTING INFORMATION

# Design of hydrazide-bearing HDACIs based on panobinostat and their p53 and FLT3-ITD dependency in anti-leukemia activity

*Xiaoyang Li<sup>1,2,#,\*</sup>, Yuqi Jiang<sup>1,#</sup>, Yuri K. Peterson<sup>2</sup>, Tongqiang Xu<sup>1</sup>, Richard A. Himes<sup>3</sup>, Xin Luo<sup>4</sup>, Guilin Yin<sup>4</sup>, Elizabeth S. Inks<sup>2</sup>, Nathan Dolloff<sup>5</sup>, Stephanie Halene<sup>6</sup>, Sherine S.L. Chan<sup>2</sup>, C. James Chou<sup>2,\*</sup>*

<sup>1</sup>Ocean University of China, School of Medicine and Pharmacy, Qingdao, Shandong, 266071, China

<sup>2</sup>Department of Drug Discovery and Biomedical Sciences, College of Pharmacy, Medical University of South Carolina, Charleston, South Carolina 29425, USA

<sup>3</sup>Department of Chemistry and Biochemistry, College of Charleston, 66 George Street, Charleston, South Carolina 29424, USA

<sup>4</sup>Technology Center of Qingdao Customs, Qingdao, Shandong, 266002, China

<sup>5</sup>Department of Cellular and Molecular Pharmacology & Experimental Therapeutics, Medical University of South Carolina, Charleston, SC29425, USA

<sup>6</sup>Section of Hematology, Department of Internal Medicine and Yale Cancer Center, Yale University School of Medicine, New Haven, CT 06511, USA.

## Contents

|                                                                                                                                                    |                  |
|----------------------------------------------------------------------------------------------------------------------------------------------------|------------------|
| <b>Figure S1.</b> IC <sub>50</sub> curves of representative compounds against HDAC1, 2, and 3.<br>-----                                            | Page S3          |
| <b>Figure S2.</b> EC <sub>50</sub> curves of SAHA, MS275, panobinostat and 13a for MV4-11 cells.<br>-----                                          | Page S4          |
| <b>Figure S3.</b> EC <sub>50</sub> curves of 16a, 16b, 16c and 28b for MV4-11 cells. -----                                                         | Page S4          |
| <b>Figure S4.</b> Inhibitory activity of 13a against APN/CD13 and MMP2/9. -----                                                                    | Page S4          |
| <b>Figure S5.</b> Inhibitory activity of 13a against HDAC1-9.-----                                                                                 | Page S5          |
| <b>Figure S6.</b> Binding mode of <b>13a</b> with catalytic site and allosteric site of HDAC1 in silico. -----                                     | page S5          |
| <b>Figure S7.</b> Treatment of <b>13a</b> , LP411, panobinostat (Pan), vorinostat (Vor) and entinostat (Ent) in wt-p53 SR cell line for 24 h.----- | page S6          |
| <b>Figure S8.</b> Combination Index (CI) for <b>13a</b> and 17-AAG after treatment for 48 h.-----<br>-----                                         | page S6          |
| <b><sup>1</sup>N NMR and <sup>13</sup>C NMR Spectrums</b> for all the target compounds.----                                                        | page S7-page S27 |
| <b>HPLC traces and purity of the target compounds</b> -----                                                                                        | page S28-pageS35 |

## Inhibition curves and ratios for representative compounds

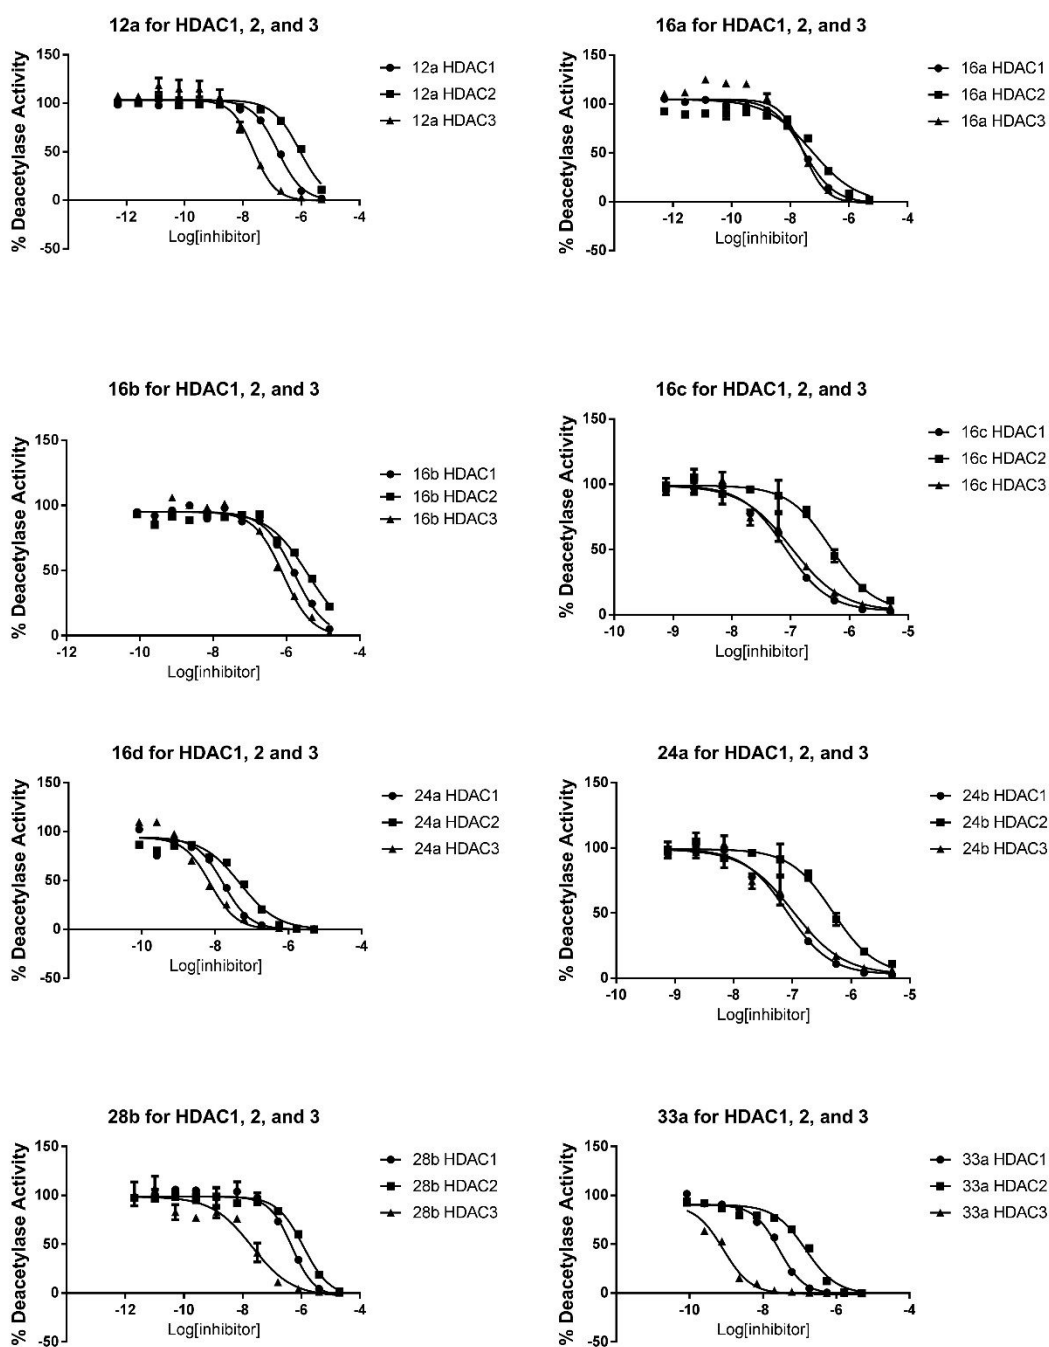

Figure S1. IC<sub>50</sub> curves of representative compounds against HDAC1, 2, and 3.

EC<sub>50</sub> of SAHA, MS275, panobinostat and 13a for MV4-11 Cells

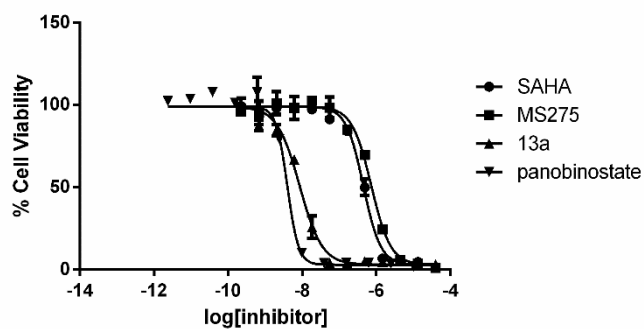

**Figure S2.** EC<sub>50</sub> curves of SAHA, MS275, panobinostat and 13a for MV4-11 cells.

EC<sub>50</sub> of 16a, 16b, 16c and 28b for MV4-11 Cells

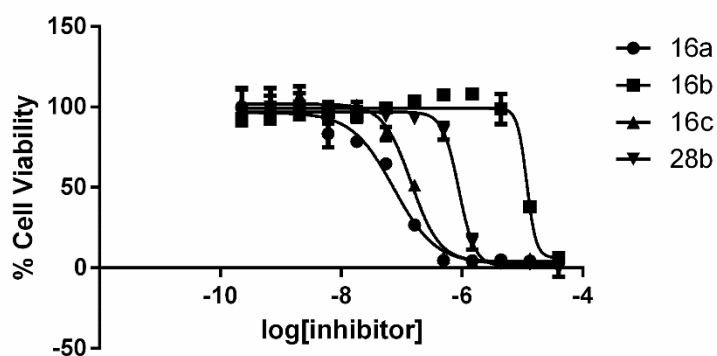

**Figure S3.** EC<sub>50</sub> curves of 16a, 16b, 16c and 28b for MV4-11 cells.

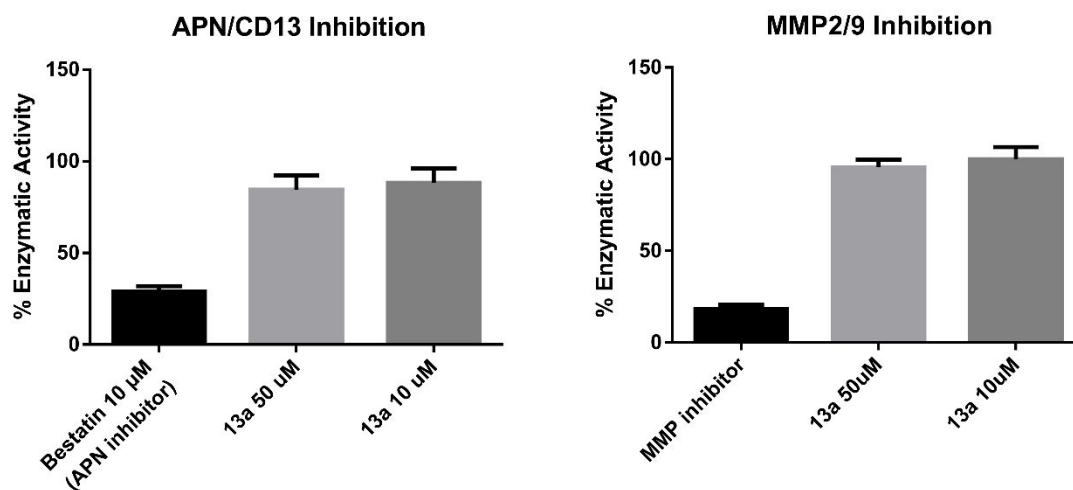

**Figure S4.** Inhibitory activity of 13a against APN/CD13 and MMP2/9.

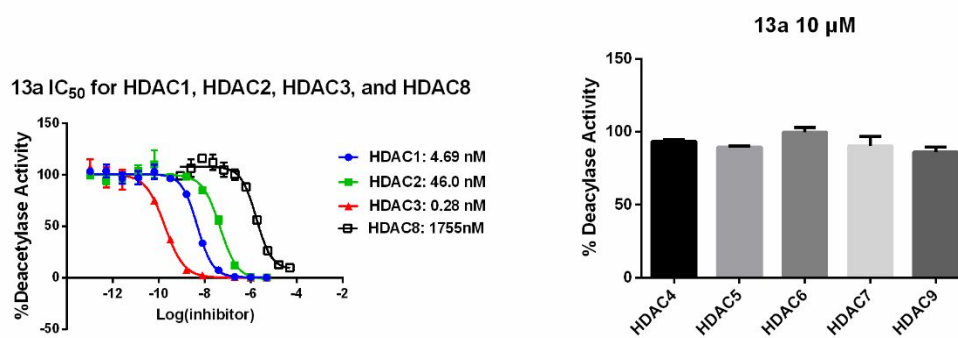

**Figure S5.** Inhibitory activity of 13a against HDAC1-9.

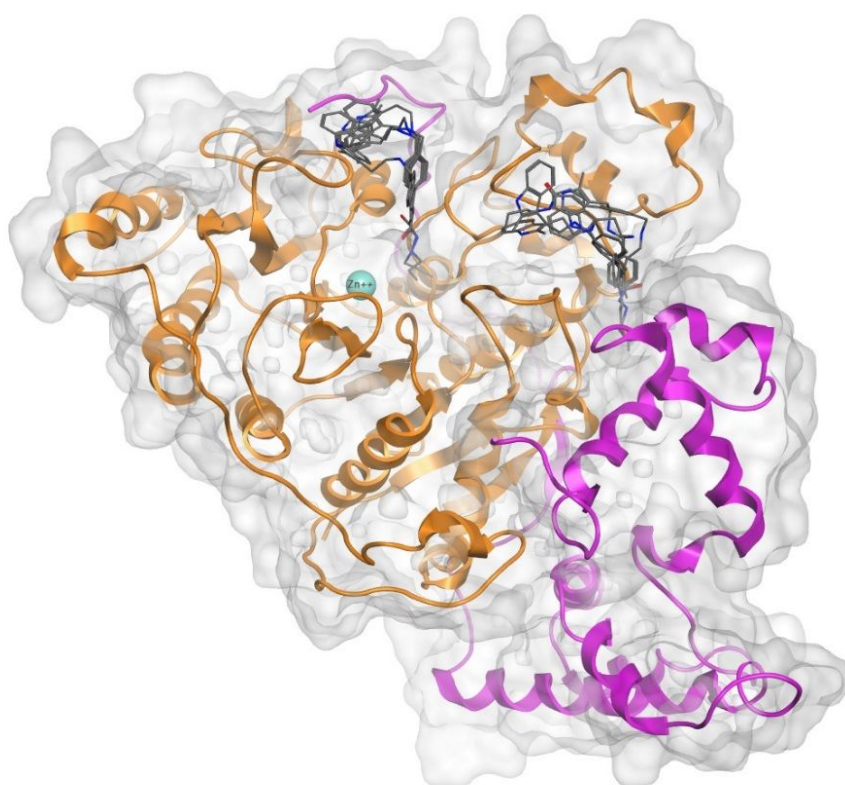

**Figure S6.** Binding mode of **13a** with catalytic site and allosteric site of HDAC1 in silico. Top 5 docking poses for each site are displayed. **13a** failed to chelate Zn metal in the catalytic site because of the long distance.

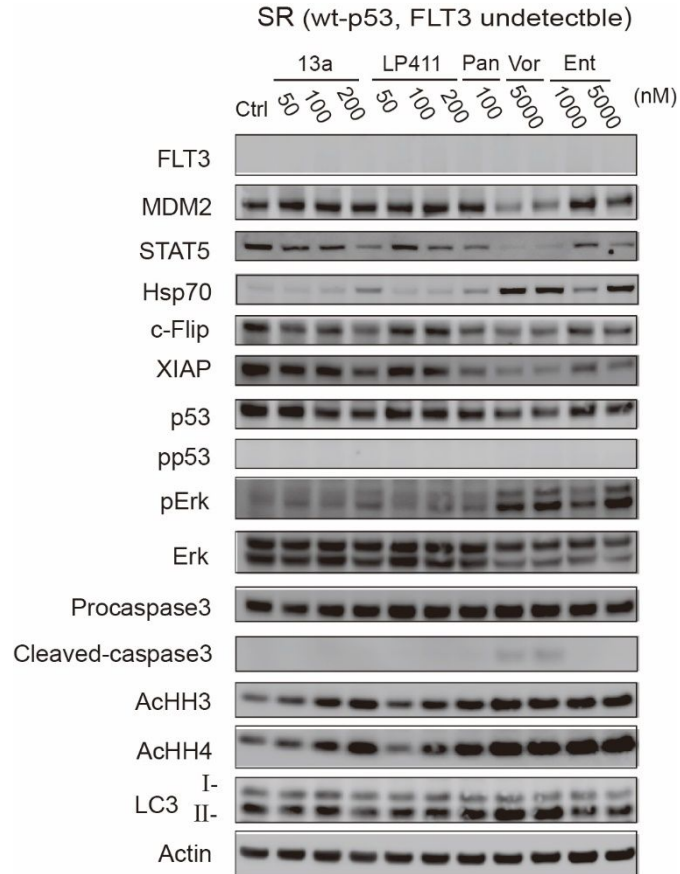

**Figure S7.** Treatment of **13a**, LP411, panobinostat (Pan), vorinostat (Vor) and entinostat (Ent) in wt-p53 SR cell line for 24 h.

| Dose 13a (nM) | Dose 17AAG (nM) | Effect | Combination Index (CI) |
|---------------|-----------------|--------|------------------------|
| 9.87          | 59.0            | 0.279  | 1.68712                |
| 9.87          | 88.0            | 0.346  | 1.57667                |
| 9.87          | 133.0           | 0.572  | 1.03593                |
| 9.87          | 200.0           | 0.762  | 0.78417                |
| 9.87          | 300.0           | 0.968  | 0.28069                |

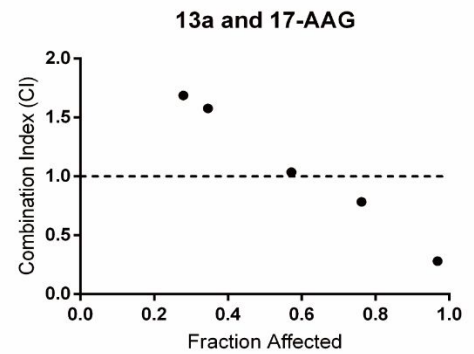

**Figure S8.** Combination Index (CI) for **13a** and 17-AAG after treatment for 48 h. Data is analysed by CompuSyn Software. CI < 1, = 1, and > 1 indicate synergism, additive effect, and antagonism, respectively.

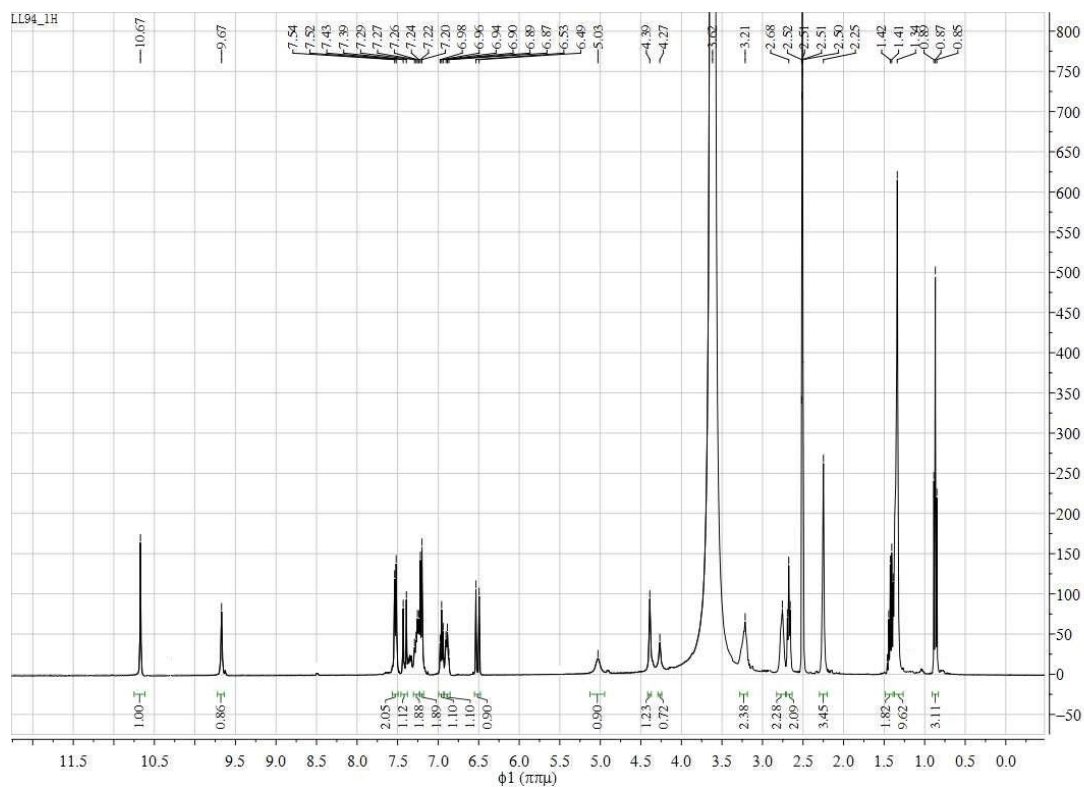

$^1\text{H-NMR}$  of 12a

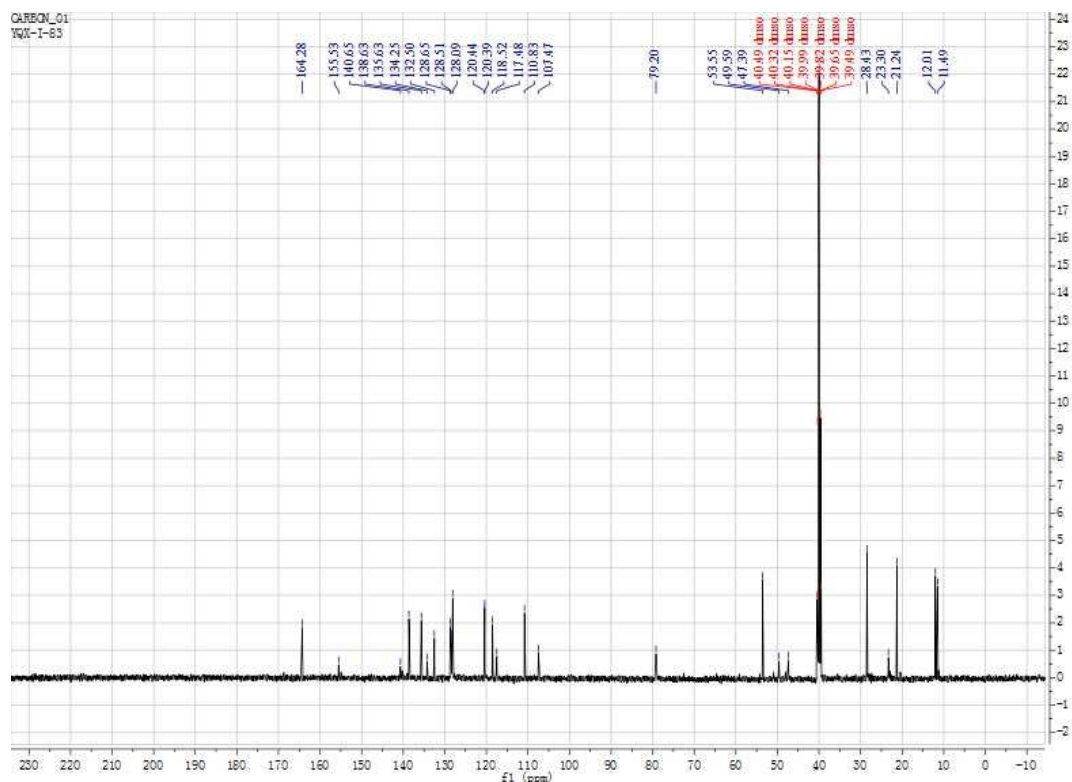

$^{13}\text{C-NMR}$  of 12a

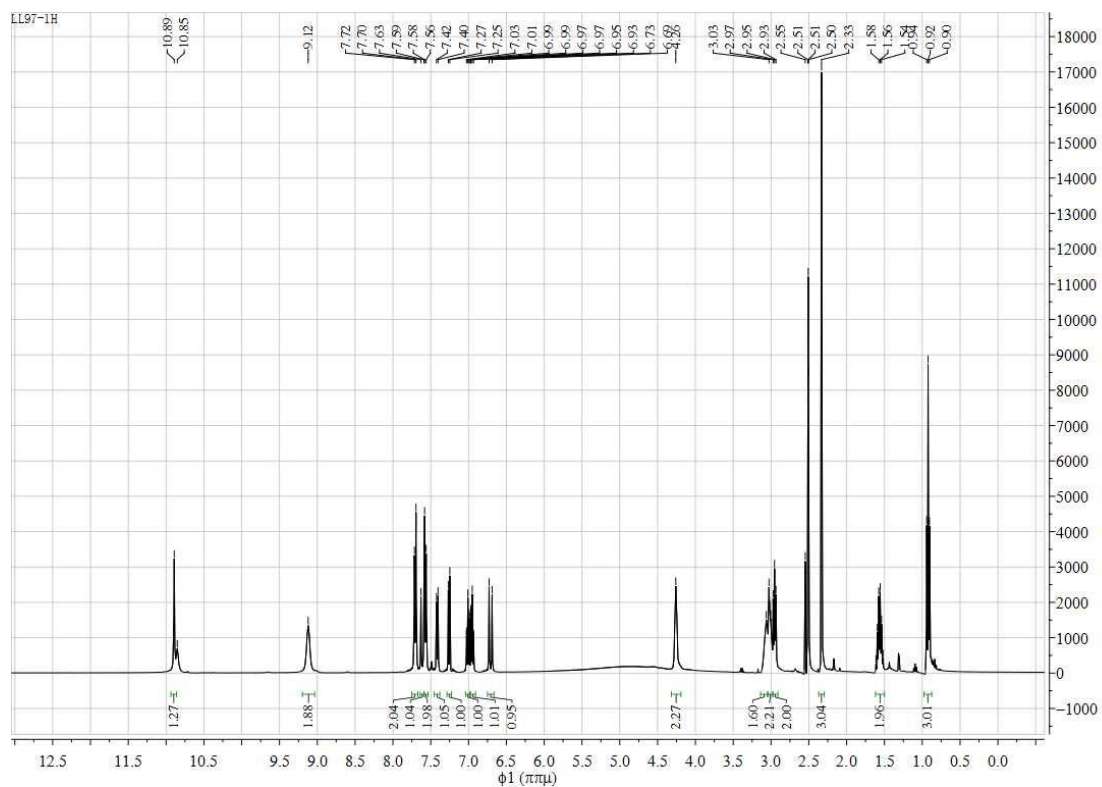

<sup>1</sup>H-NMR of 13a

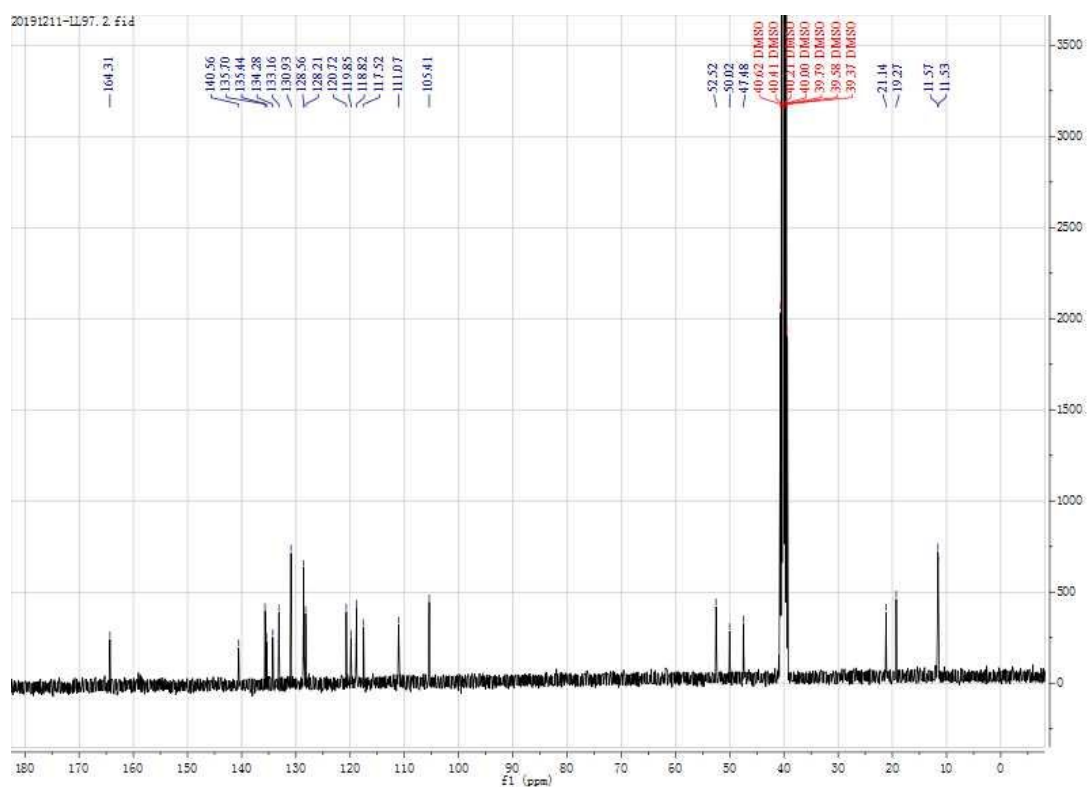

<sup>13</sup>C-NMR of 13a



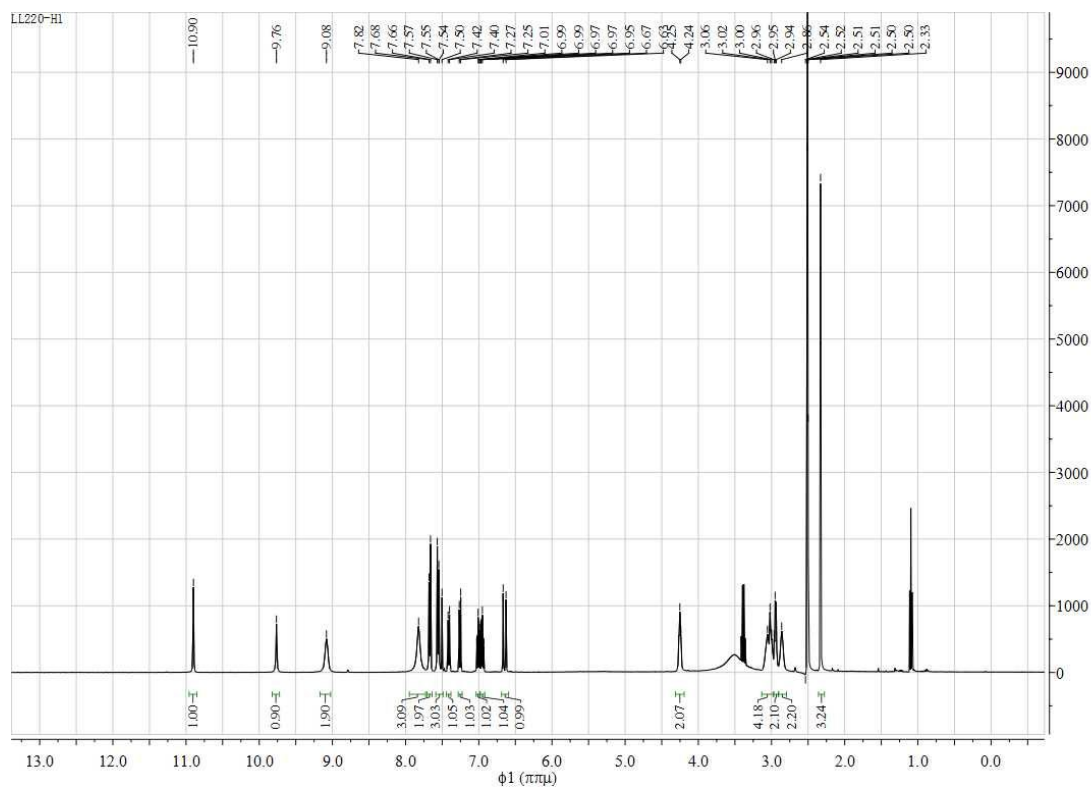

<sup>1</sup>H-NMR of 13b

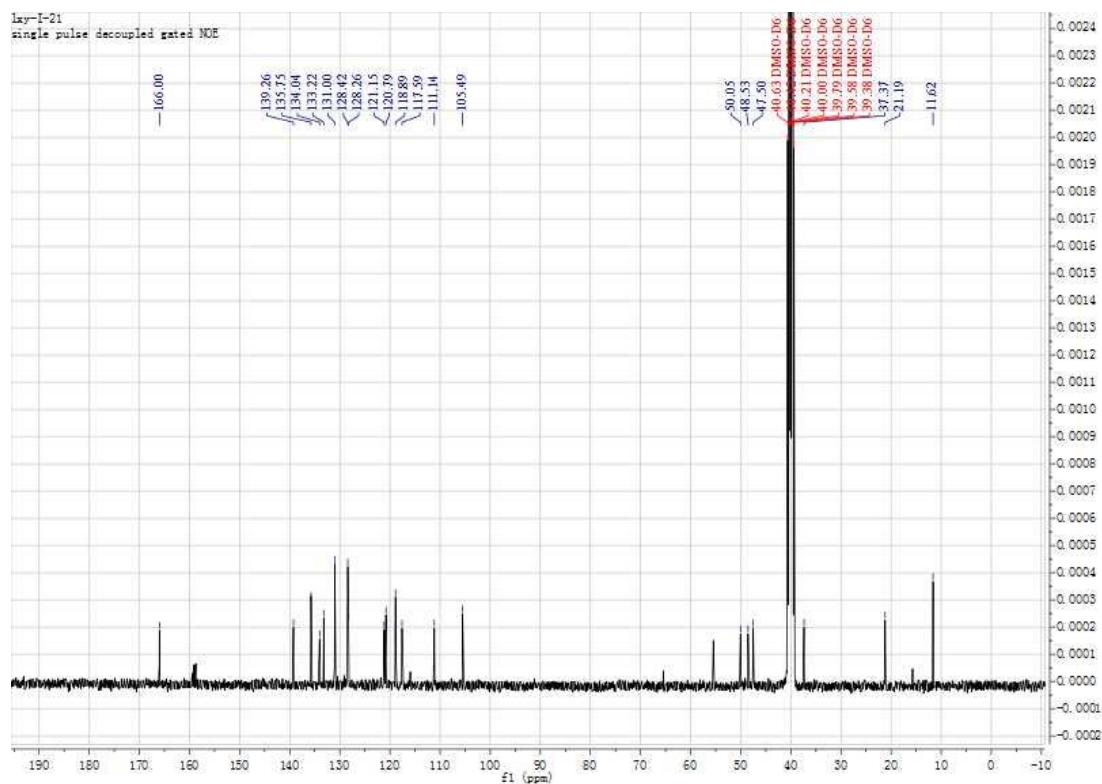

<sup>13</sup>C-NMR of 13b

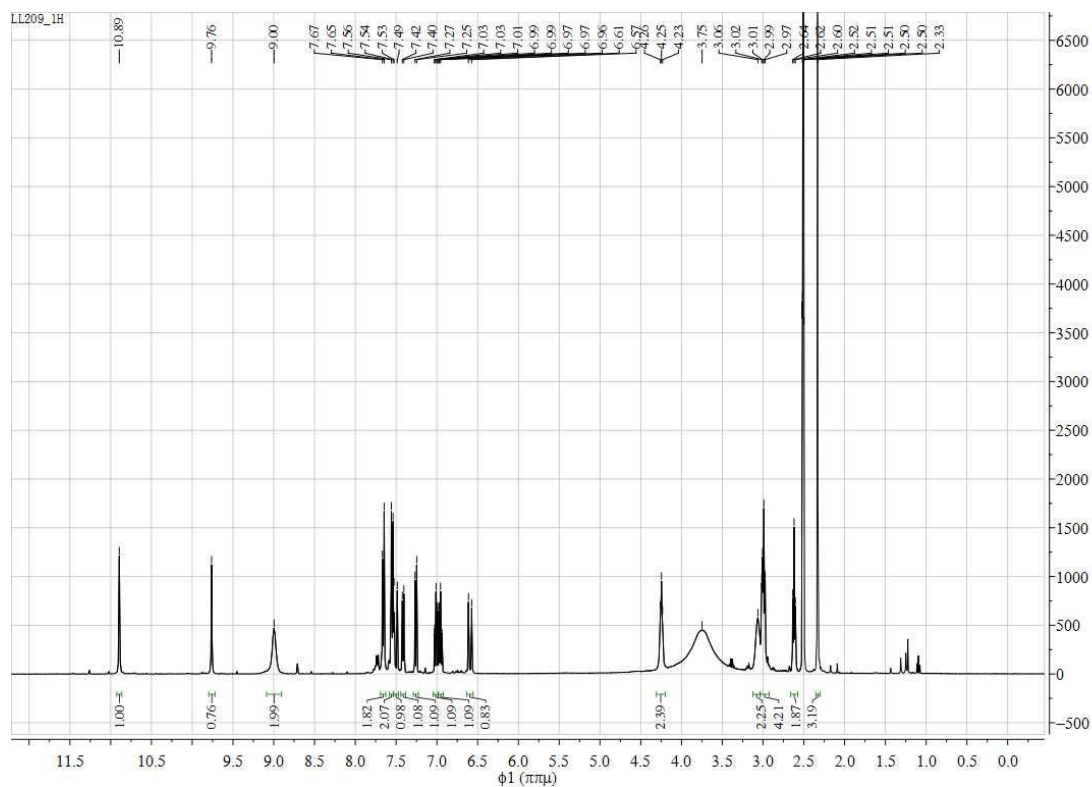

<sup>1</sup>H-NMR of 13c

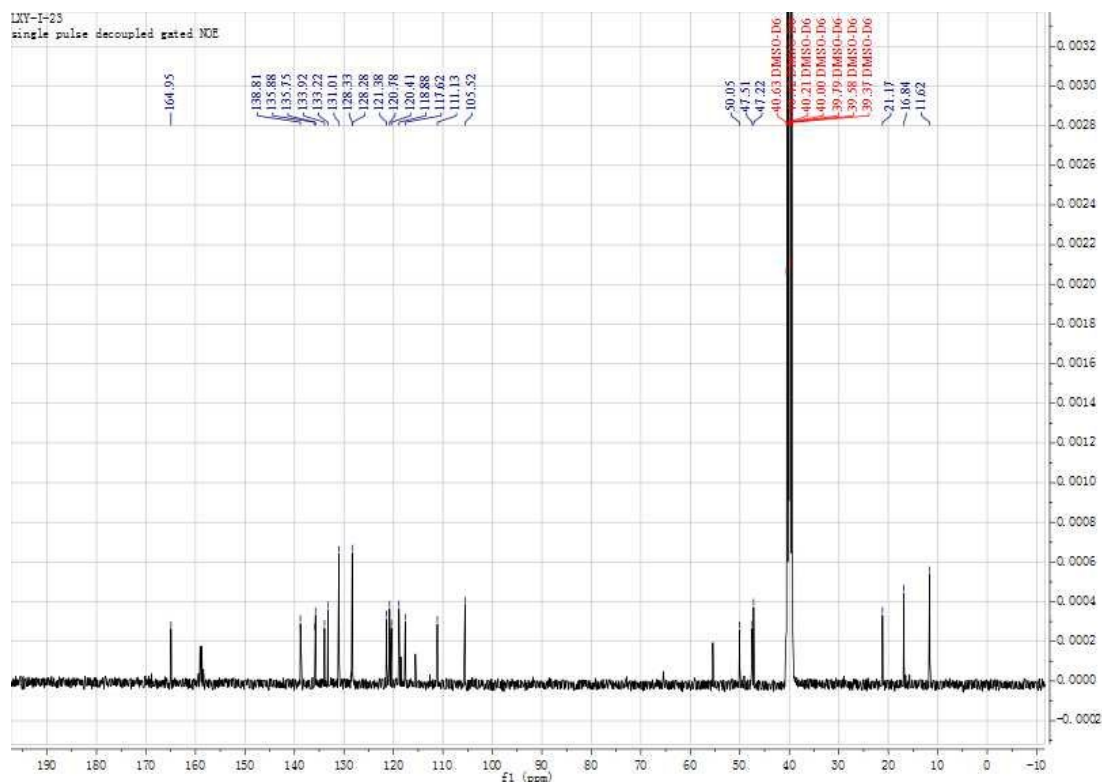

<sup>13</sup>C-NMR of 13c

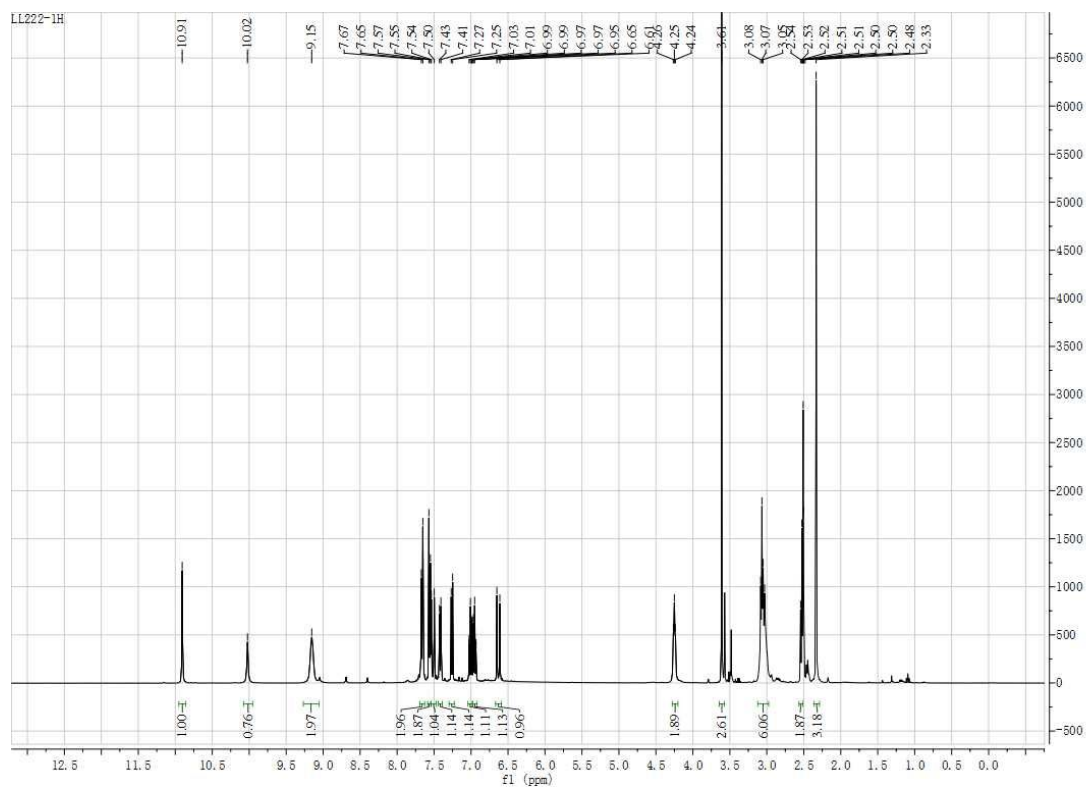

$^1\text{H-NMR}$  of 13d

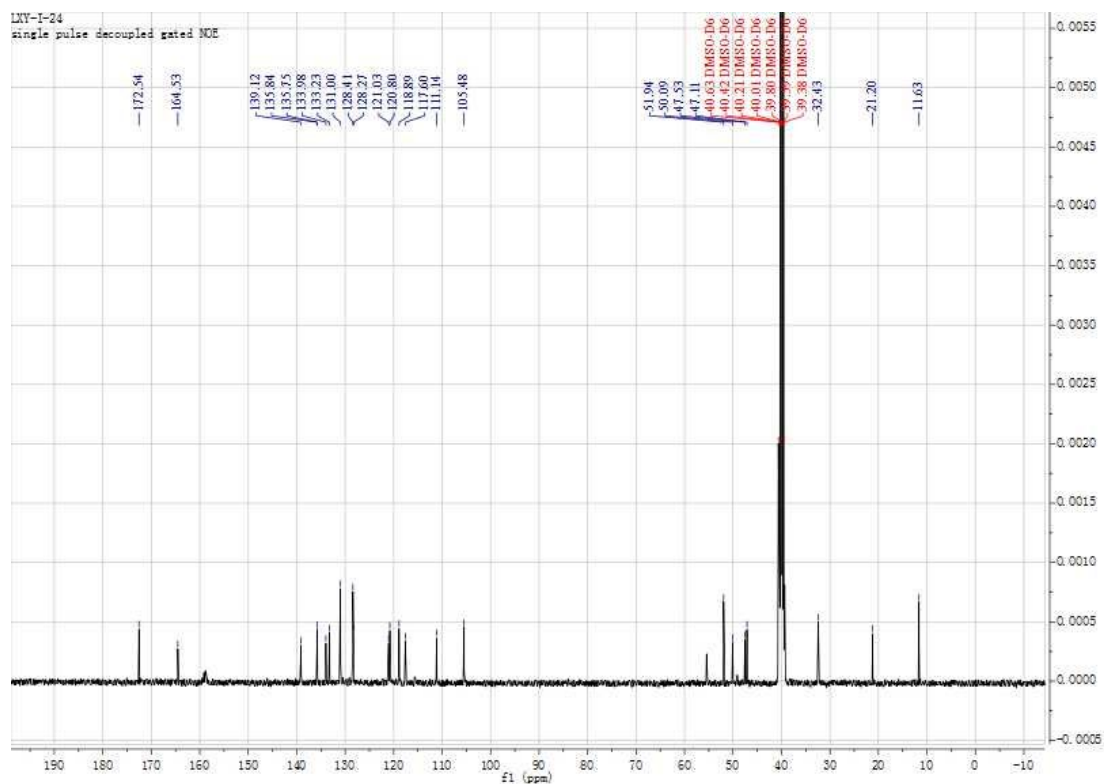

$^{13}\text{C-NMR}$  of 13d

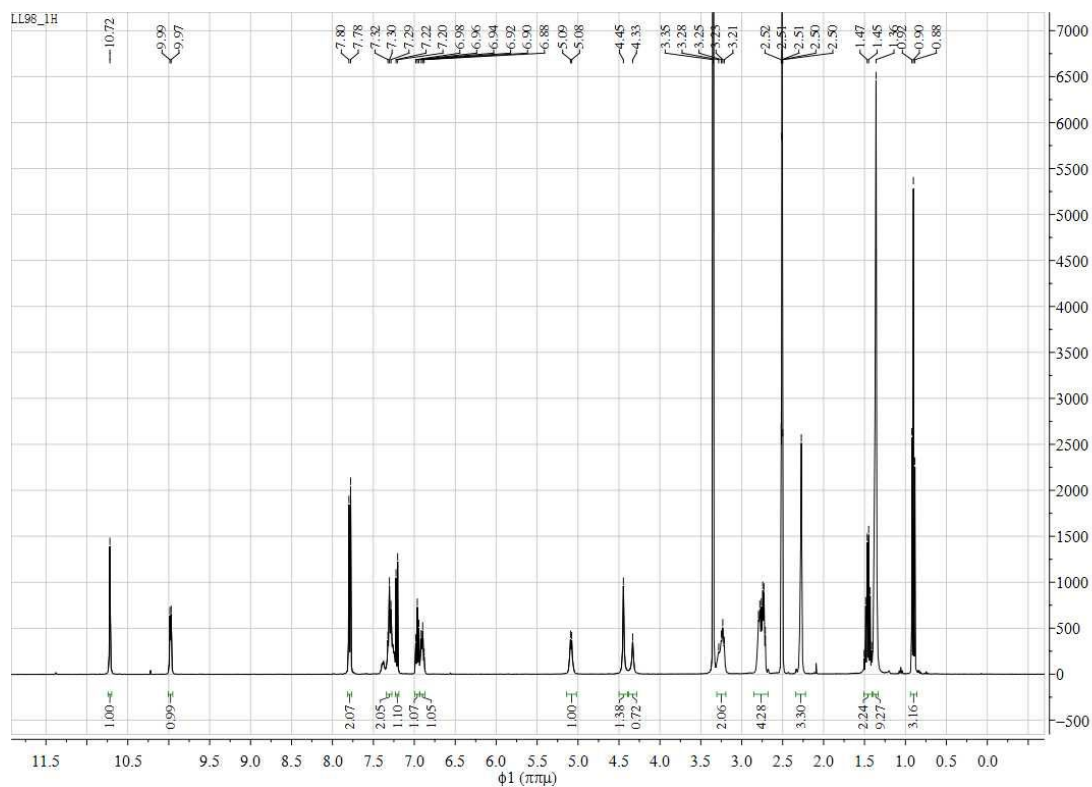

<sup>1</sup>H-NMR of 15a

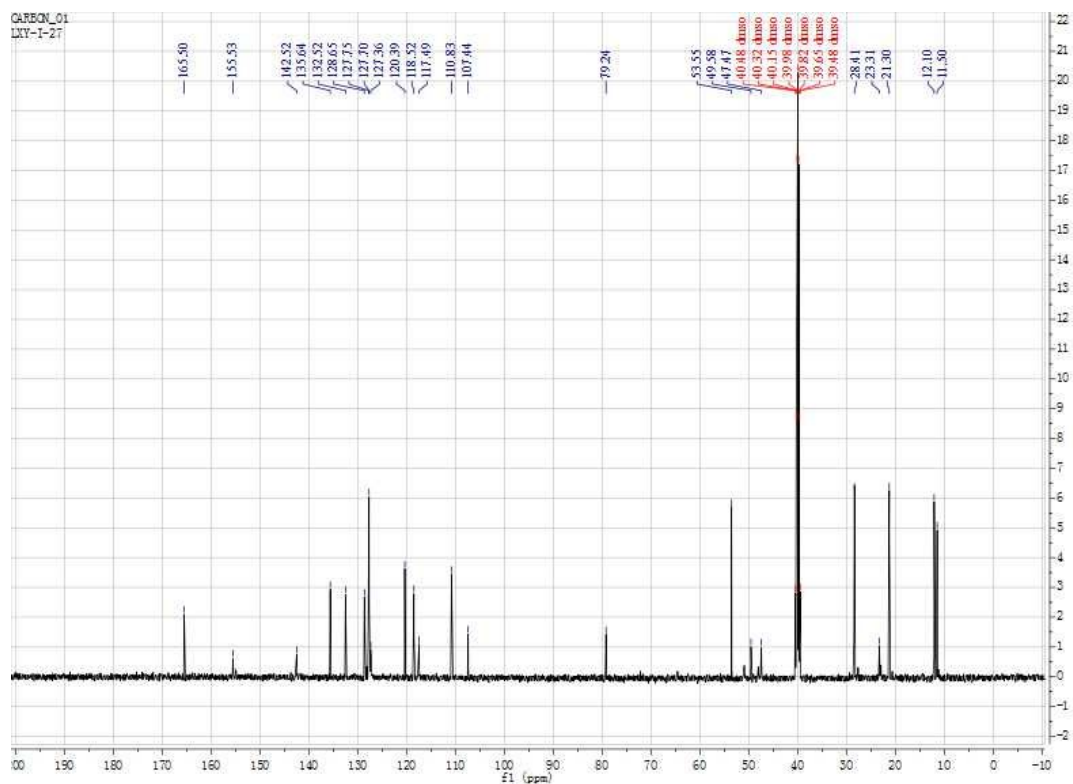

<sup>13</sup>C-NMR of 15a

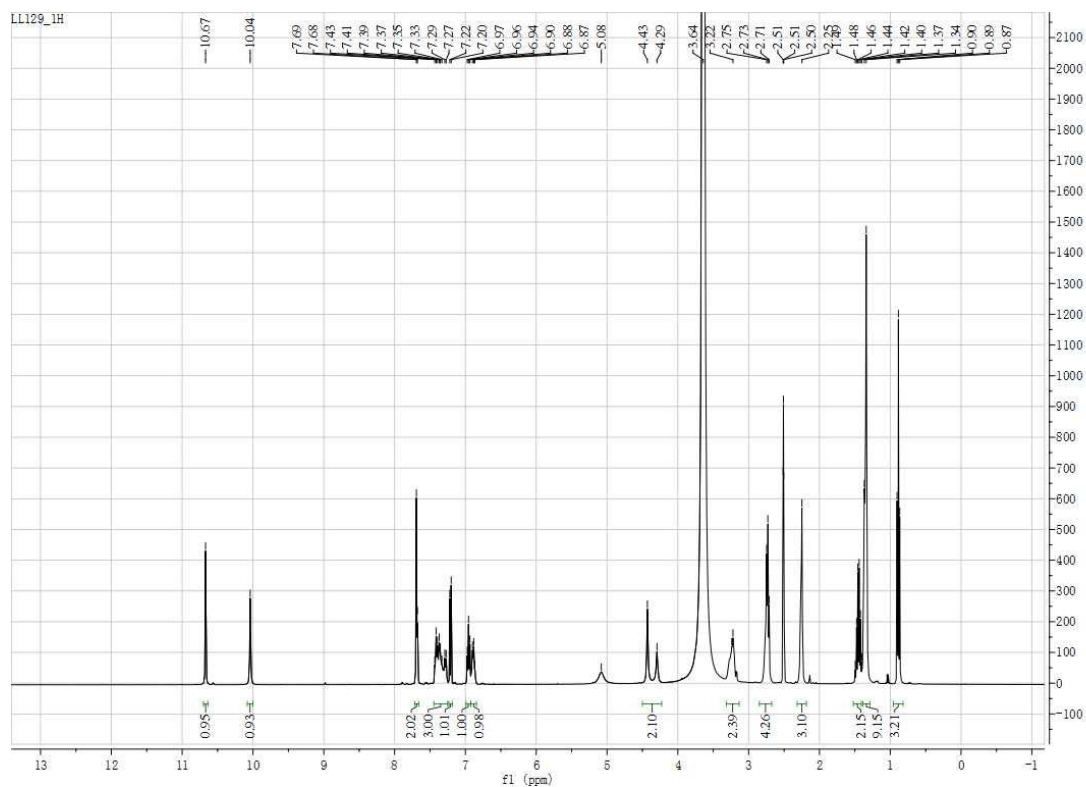

<sup>1</sup>H-NMR of 15b

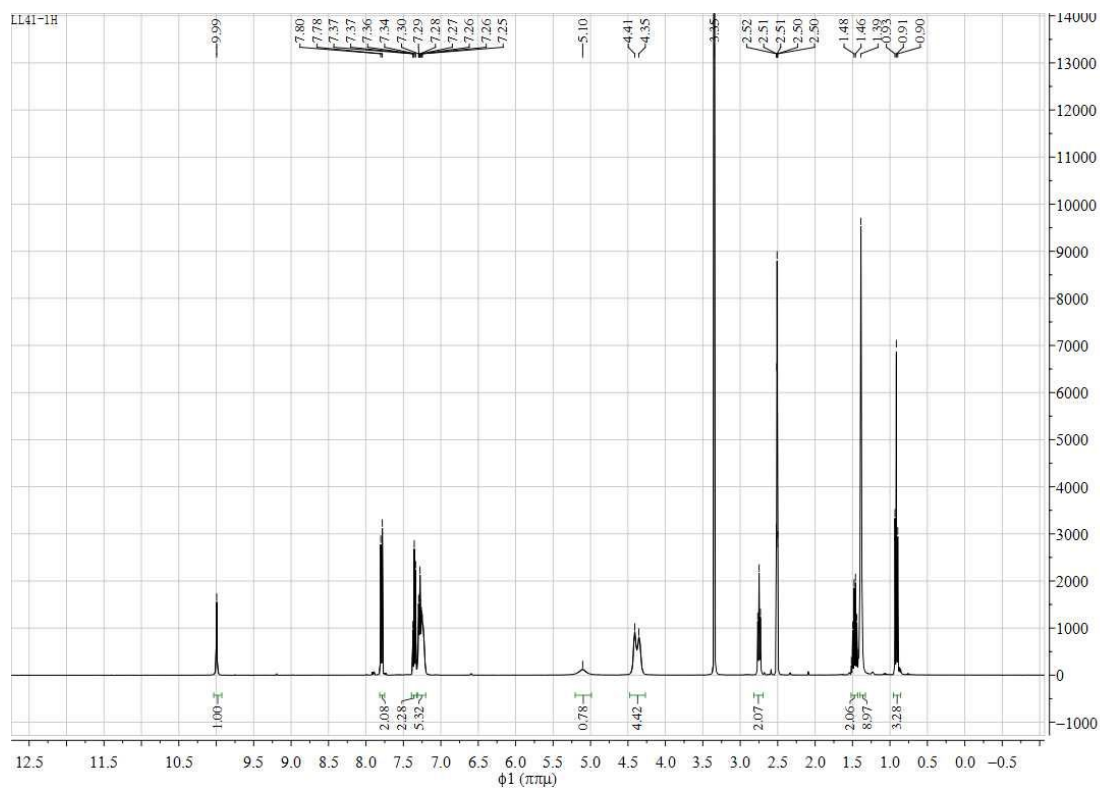

<sup>1</sup>H-NMR of 15c



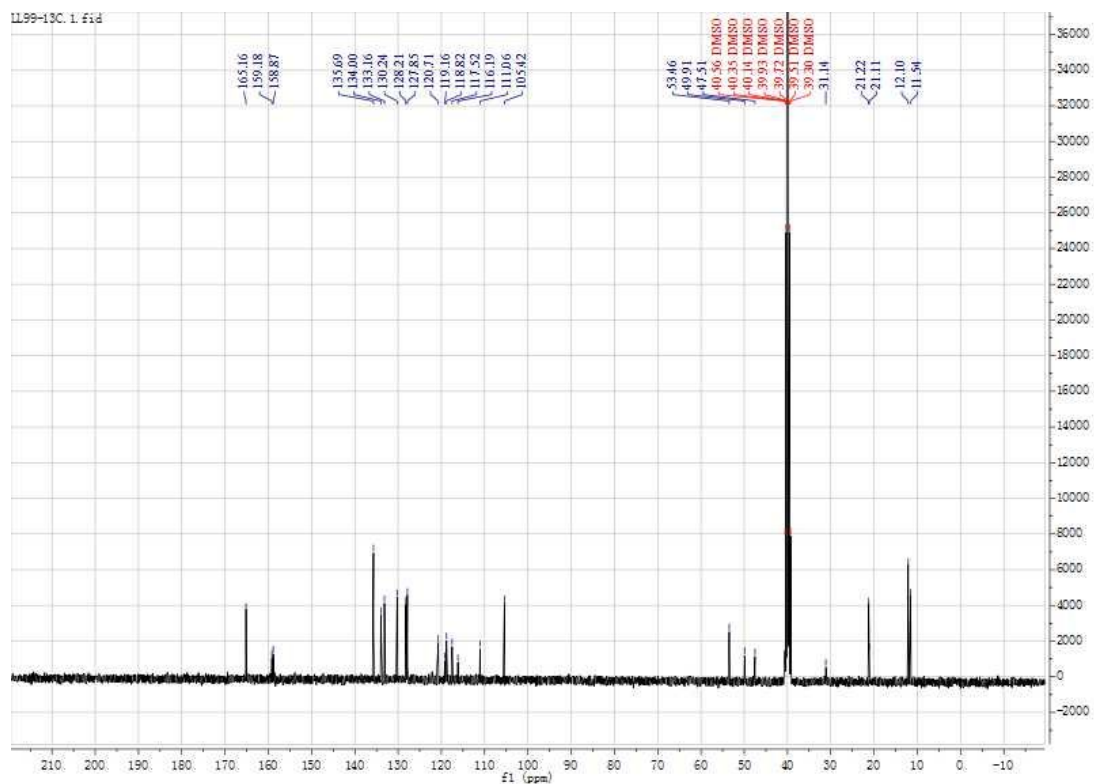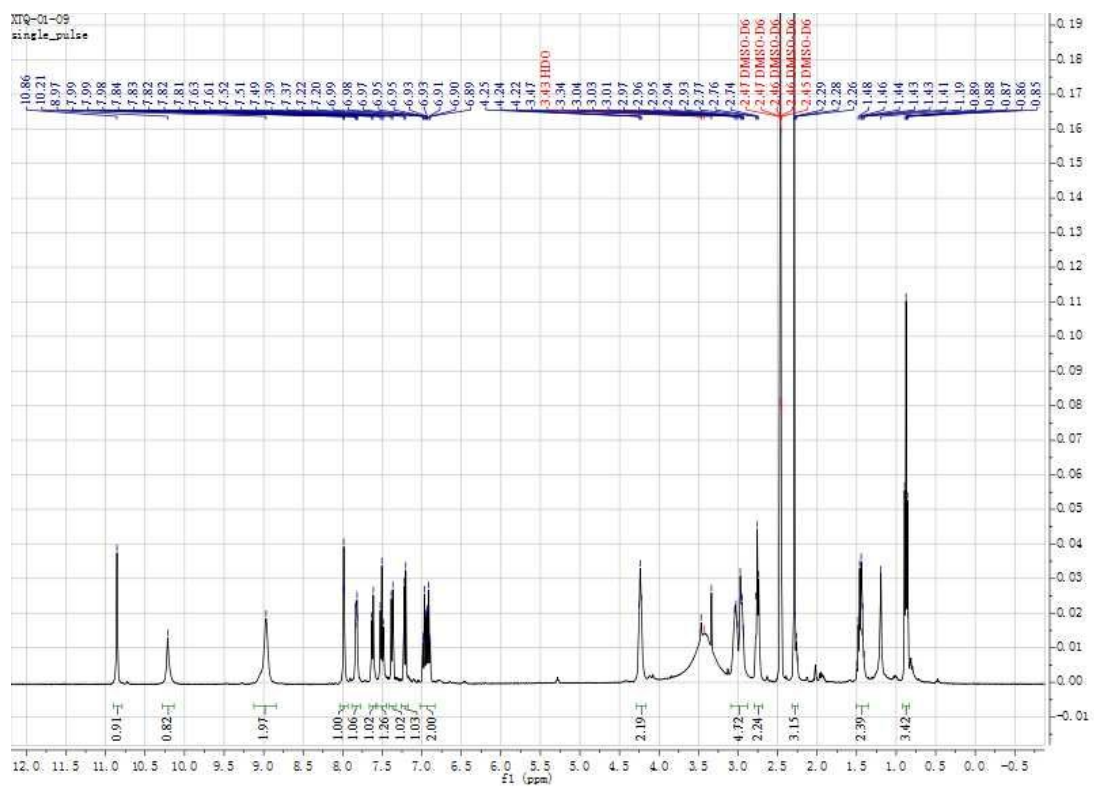

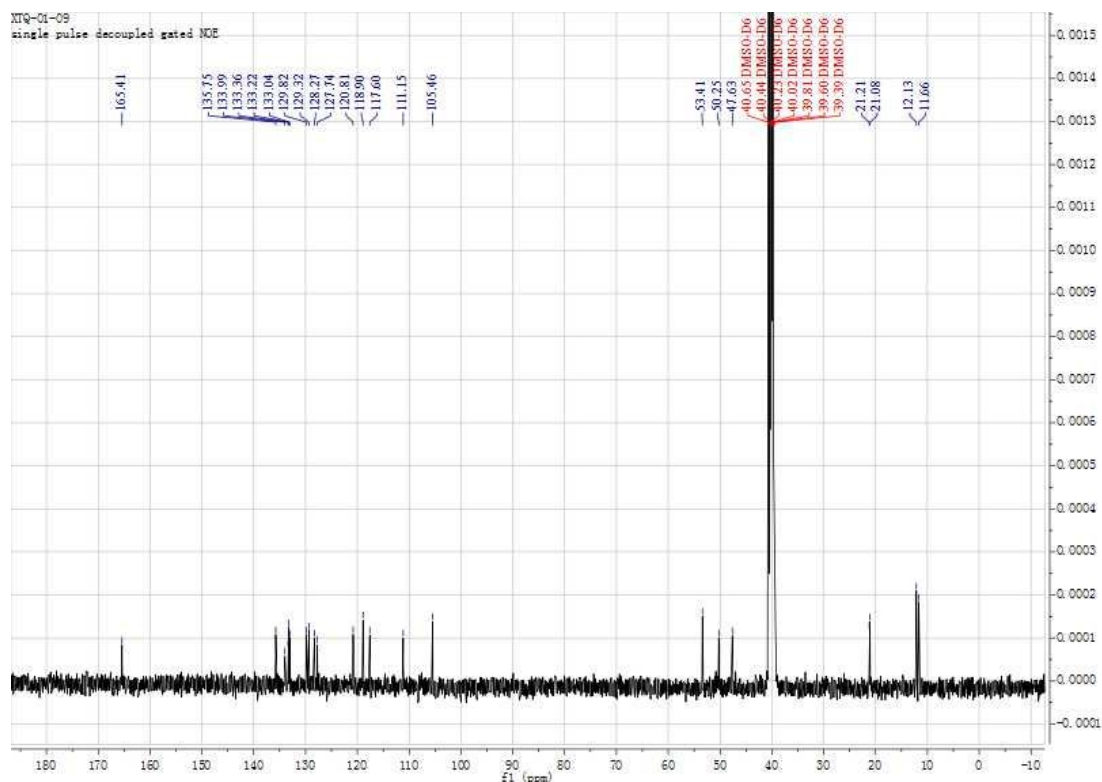

$^{13}\text{C}$ -NMR of 16b

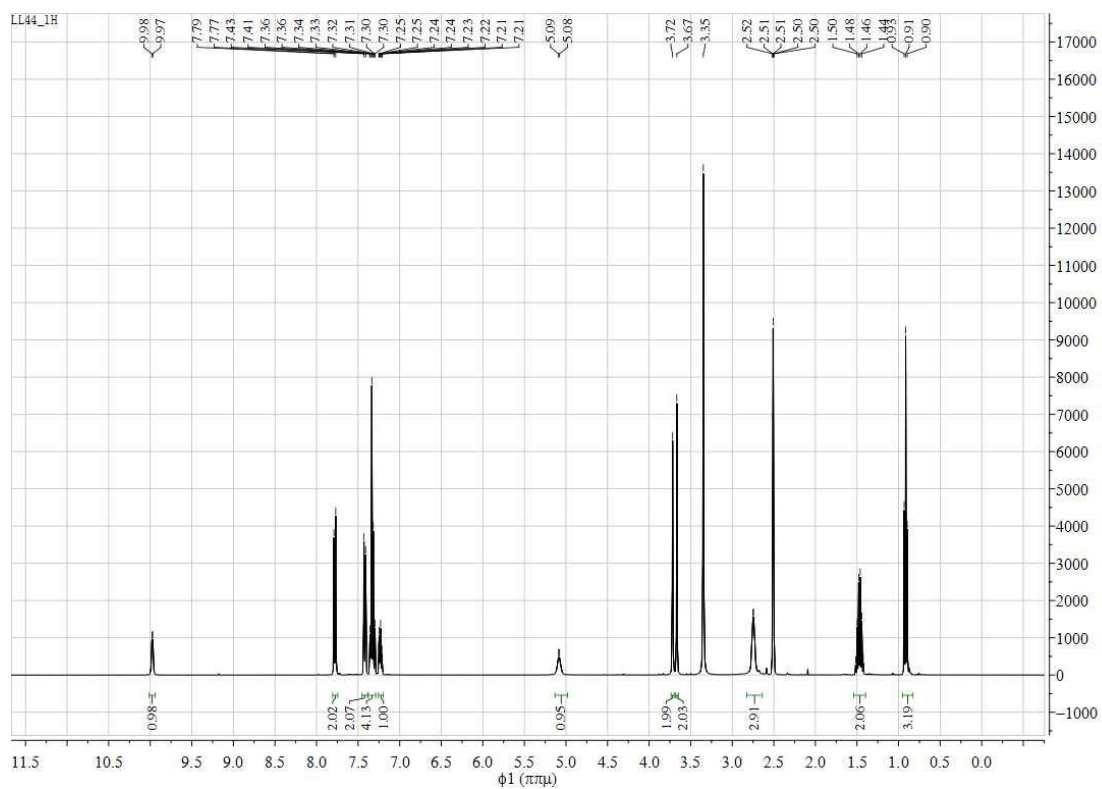

$^1\text{H}$ -NMR of 16c



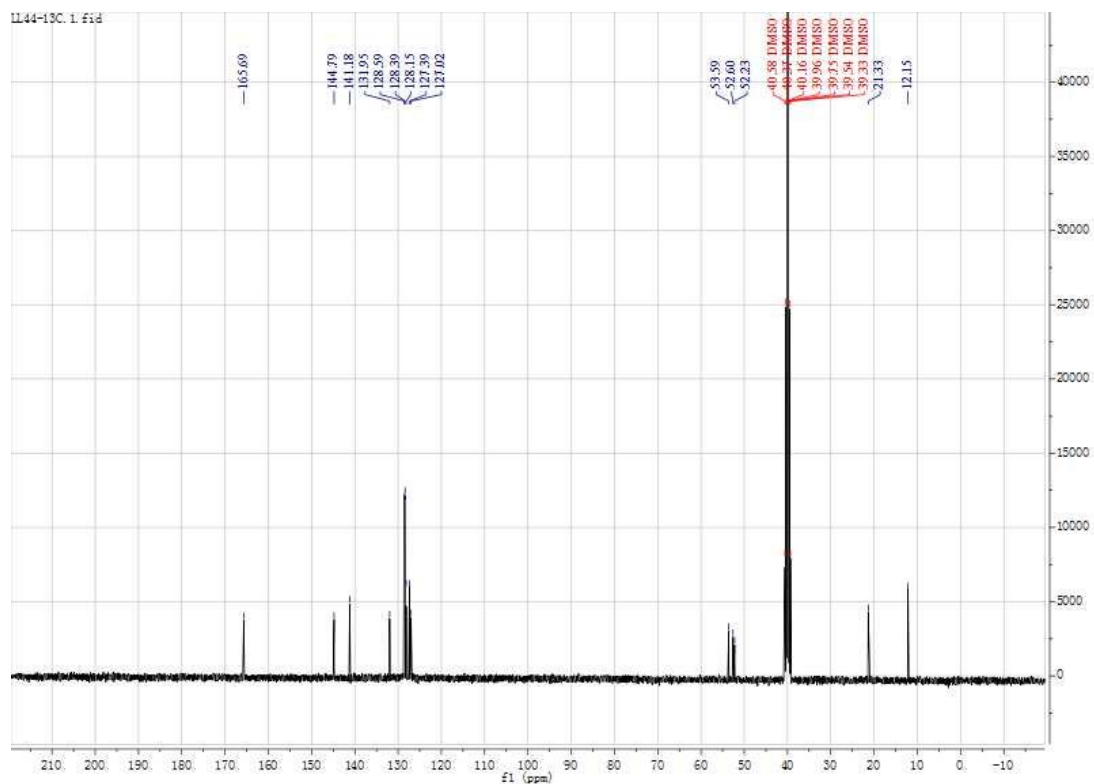

$^{13}\text{C}$ -NMR of 16c

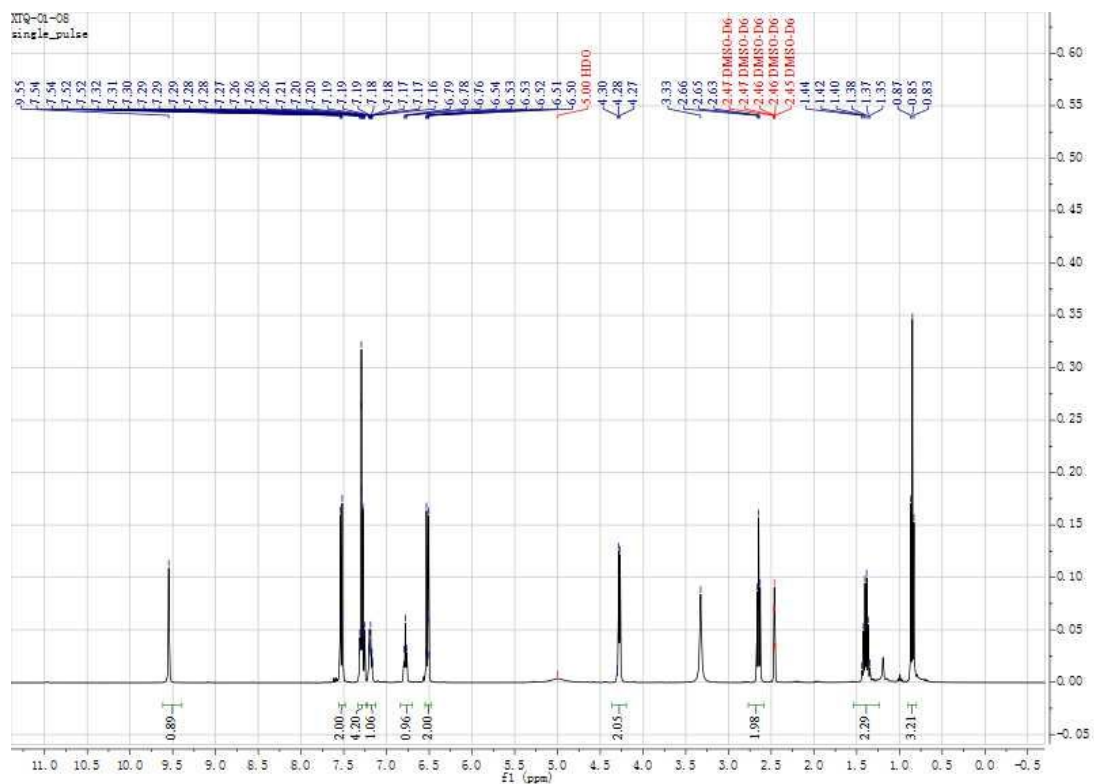

$^1\text{H}$ -NMR of 24a

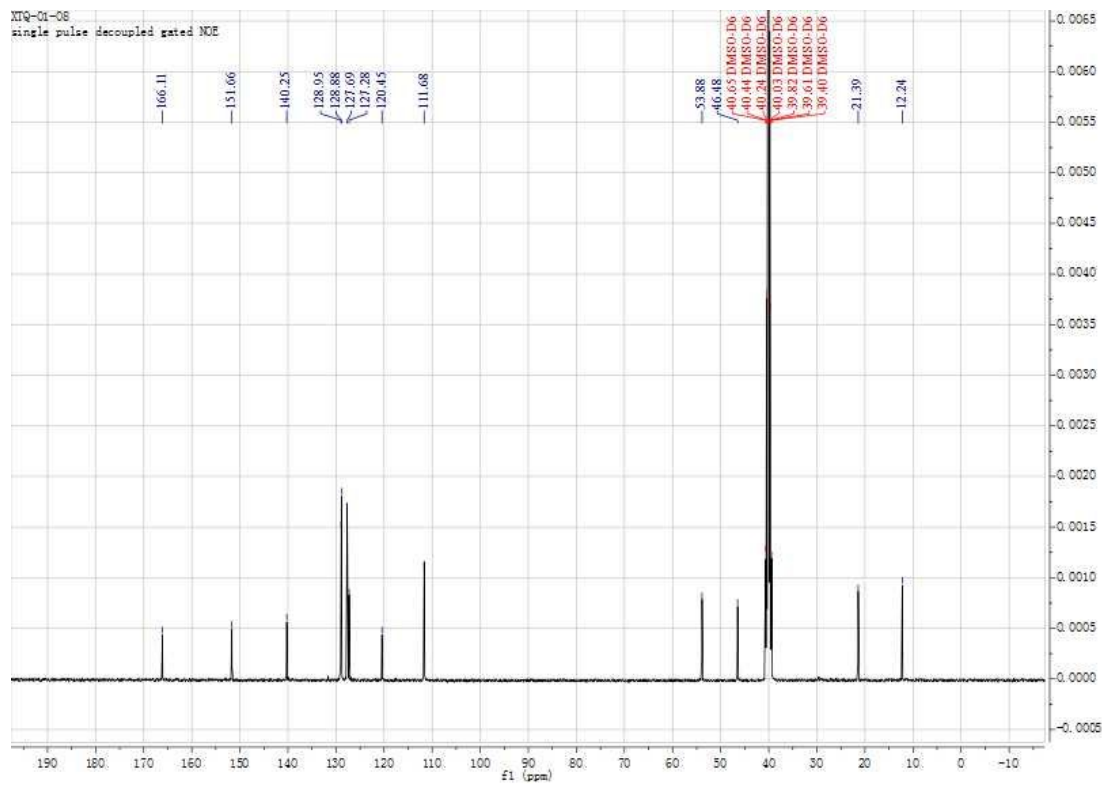

$^{13}\text{C}$ -NMR of 24a

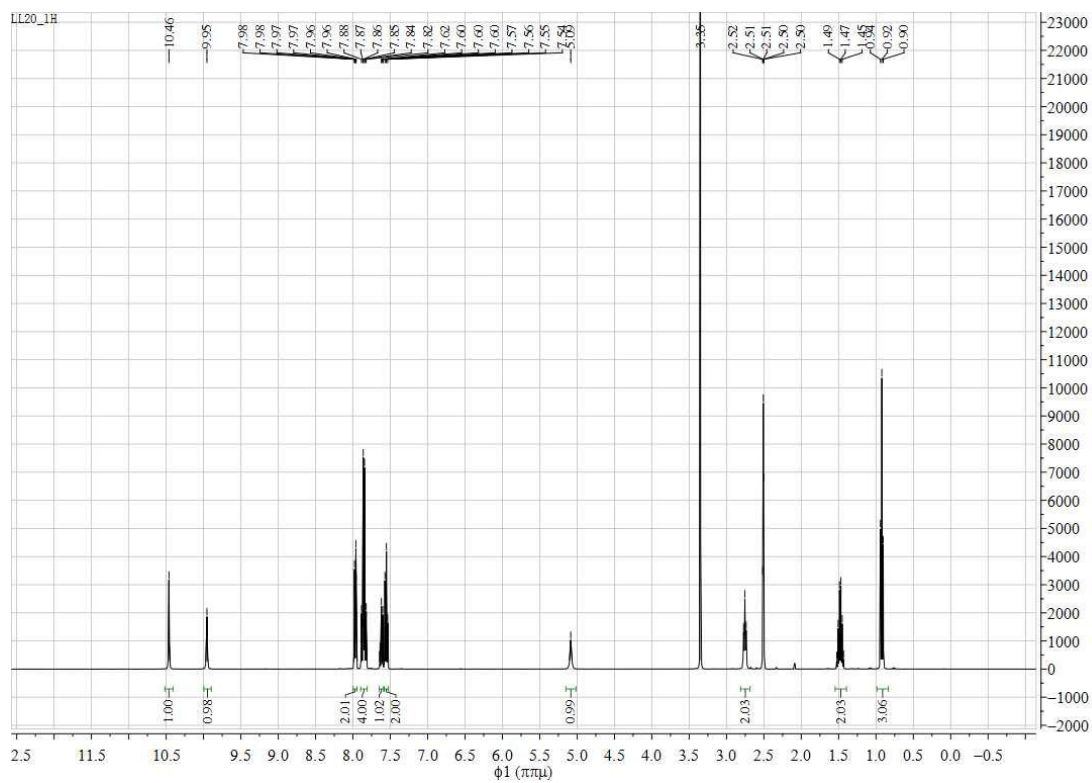

$^1\text{H}$ -NMR of 24b

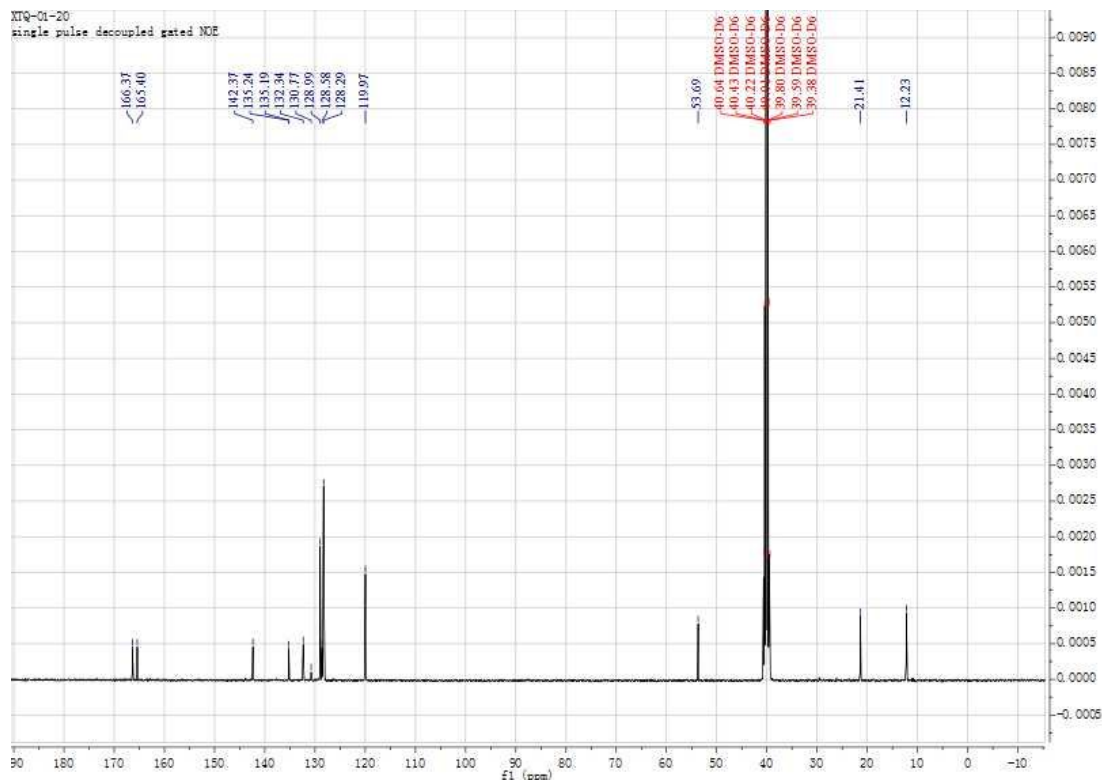

$^{13}\text{C}$ -NMR of 24b

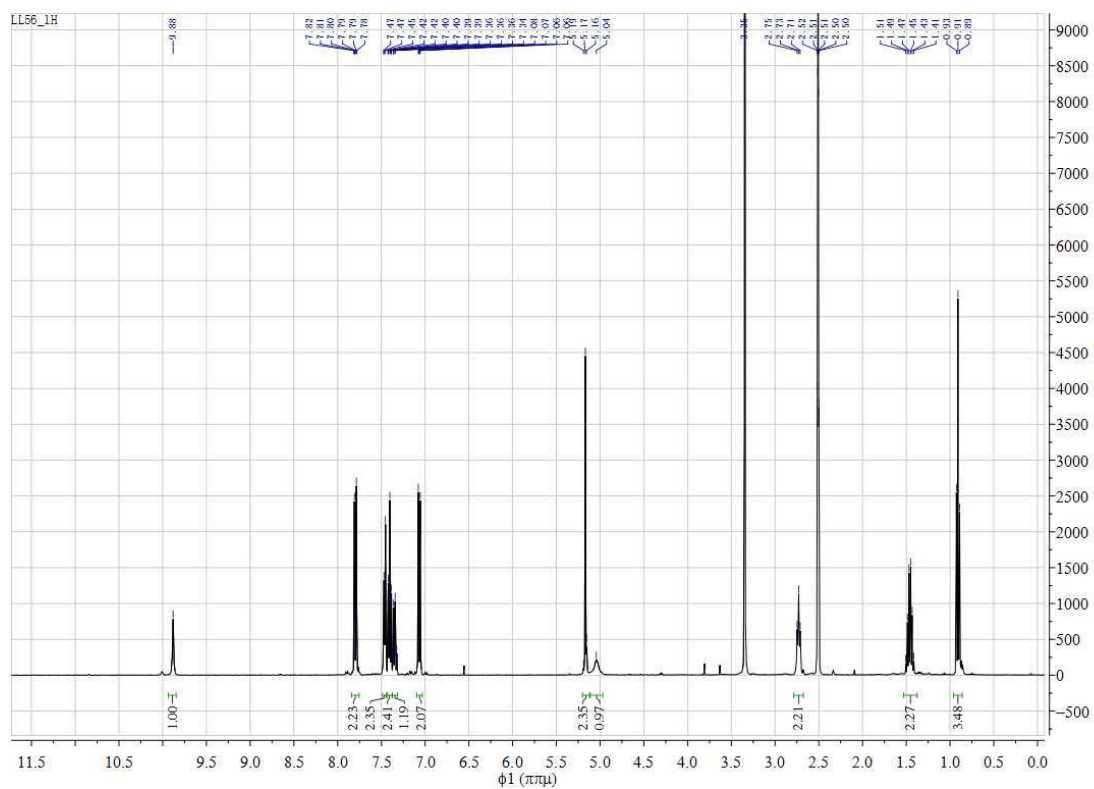

$^1\text{H}$ -NMR of 24c

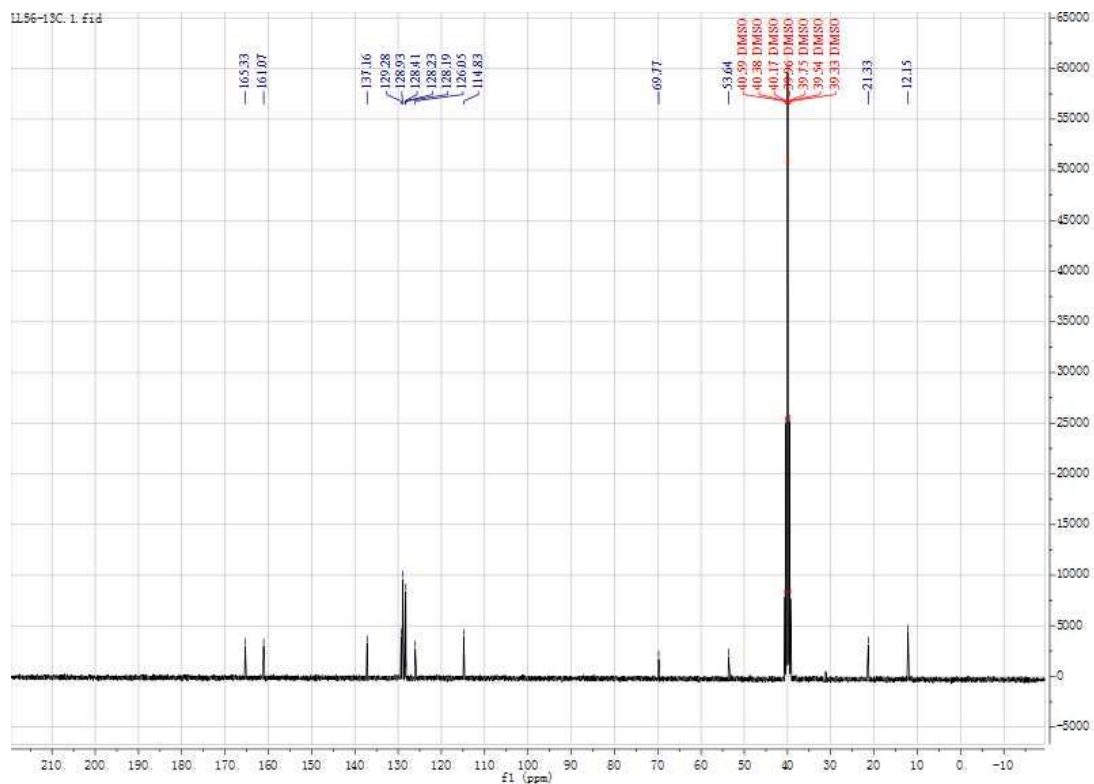

$^{13}\text{C}$ -NMR of 24c

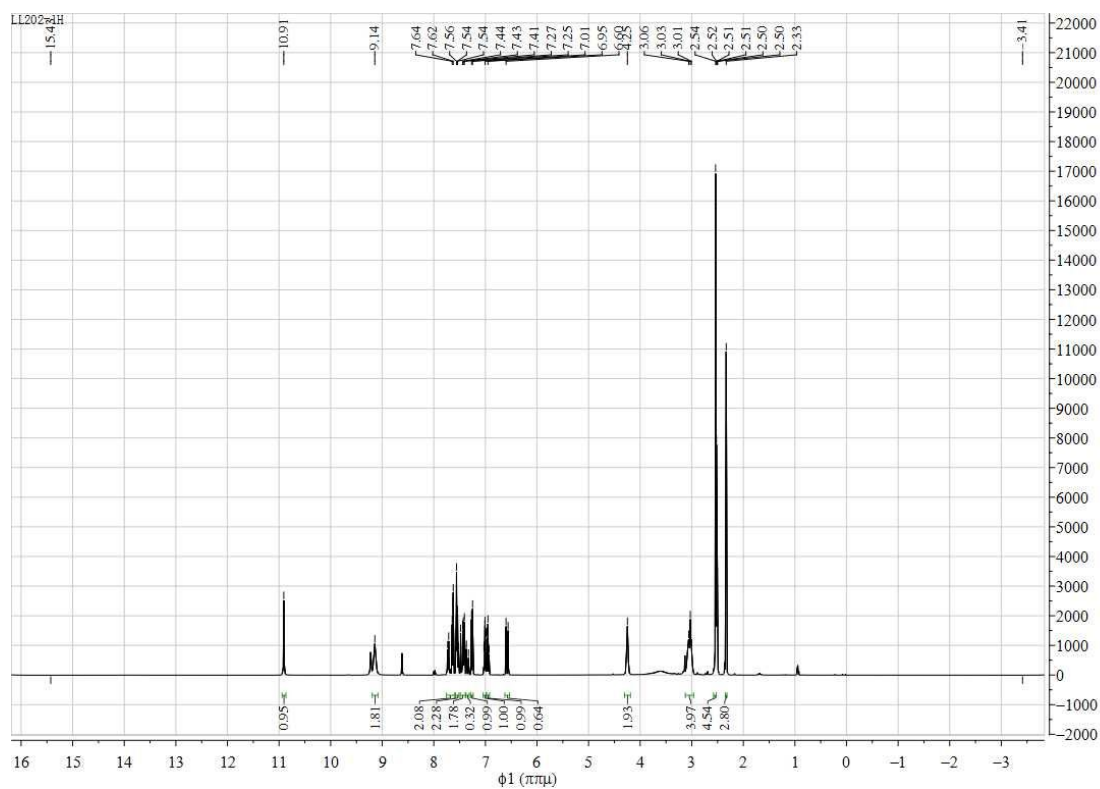

$^1\text{H}$ -NMR of 26a

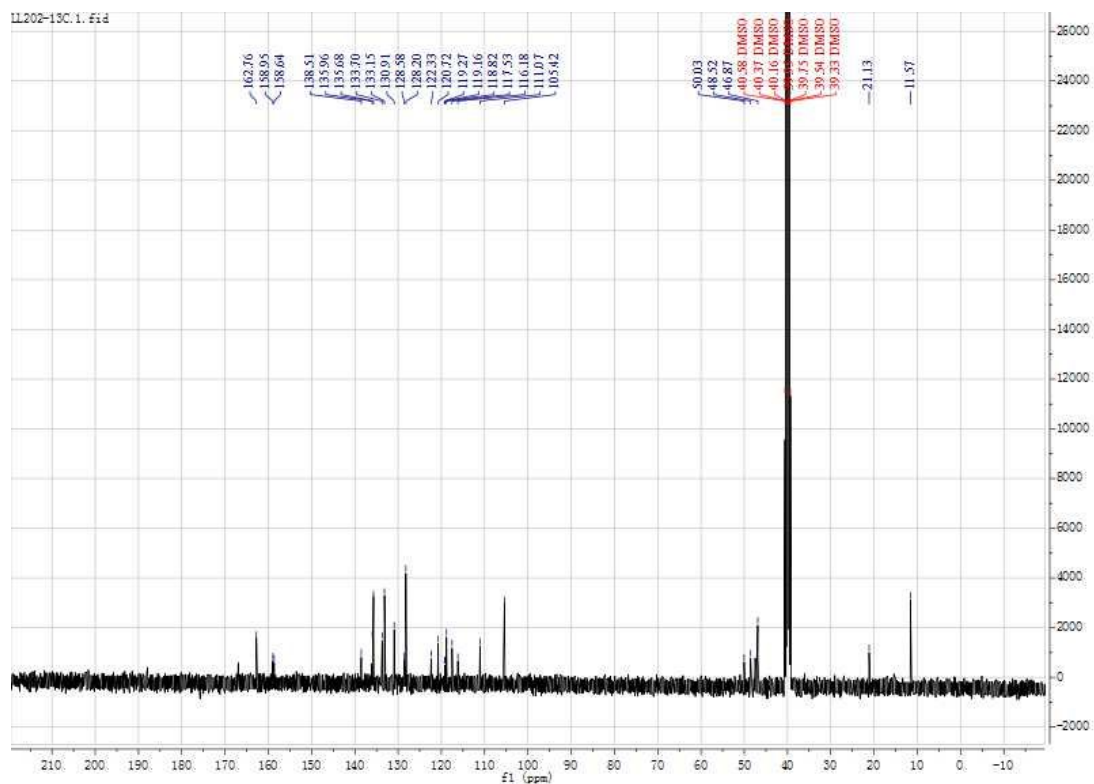

$^{13}\text{C}$ -NMR of 26a

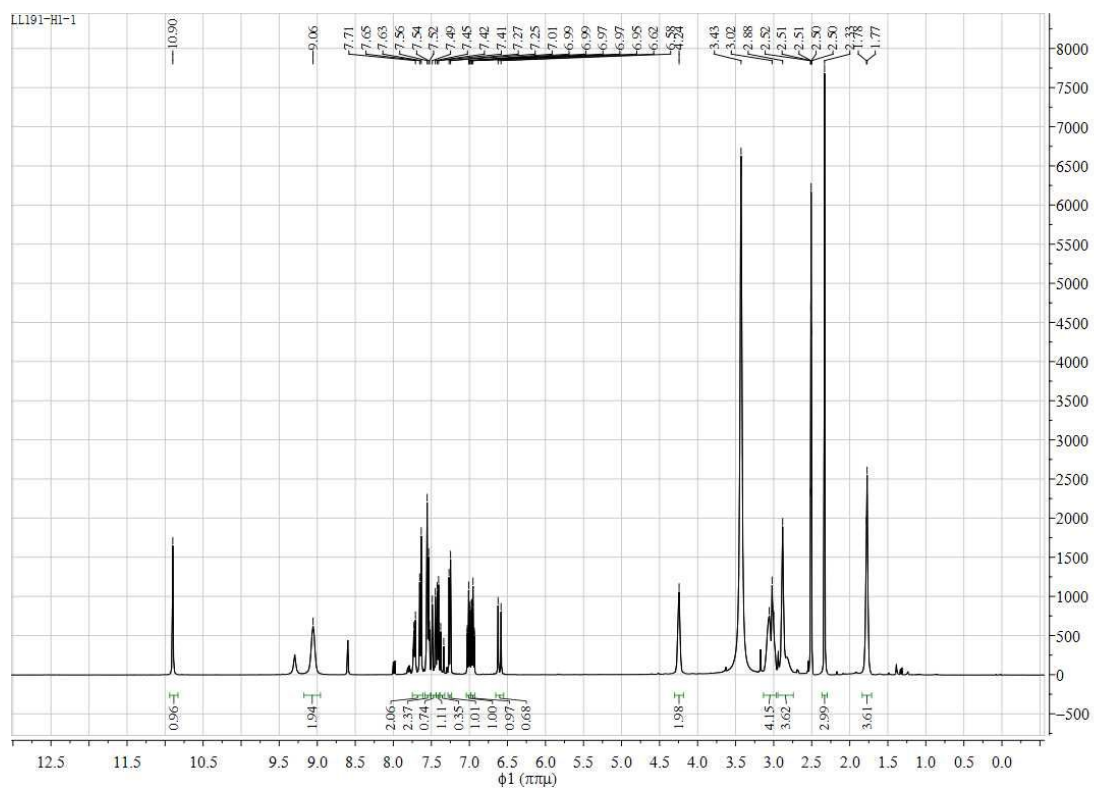

$^1\text{H}$ -NMR of 26b

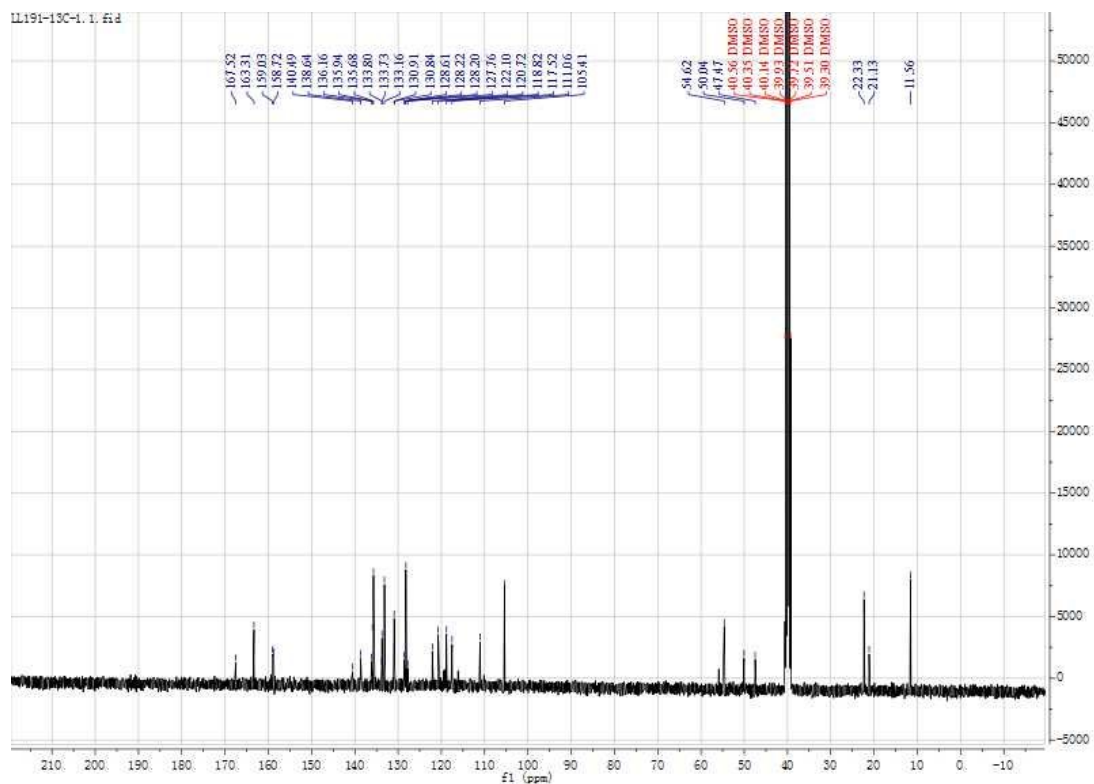

$^{13}\text{C-NMR}$  of 26b

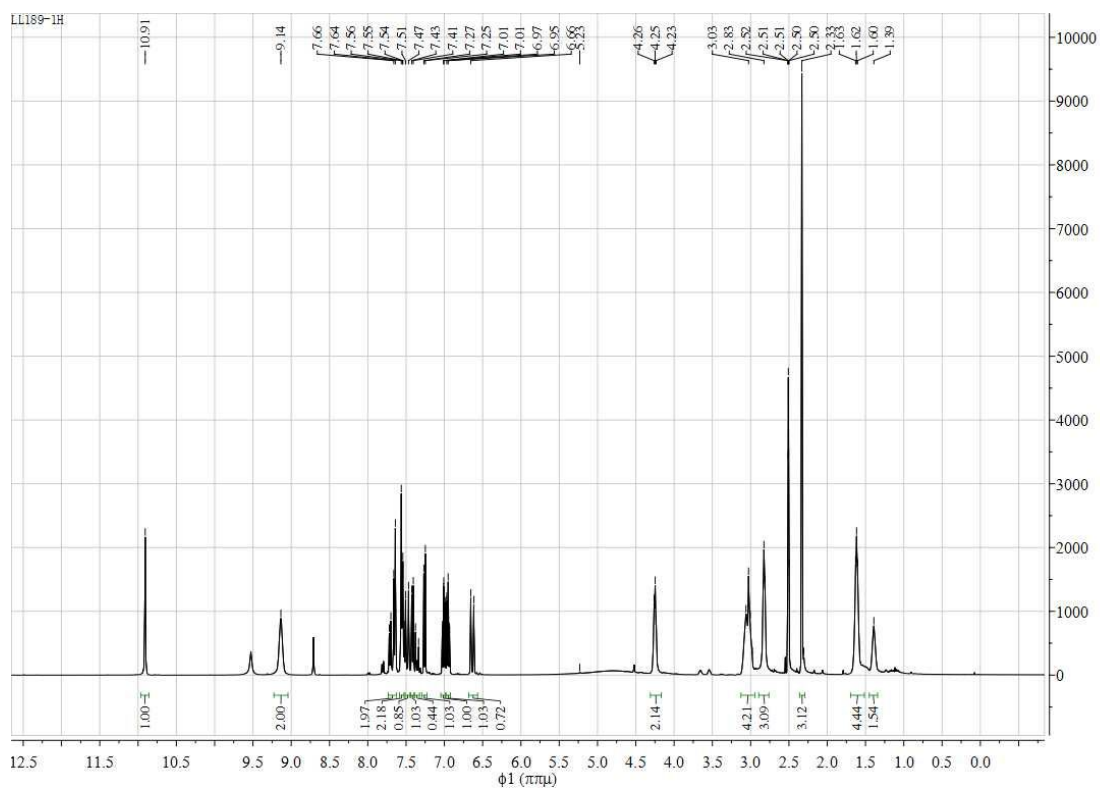

$^1\text{H-NMR}$  of 26c

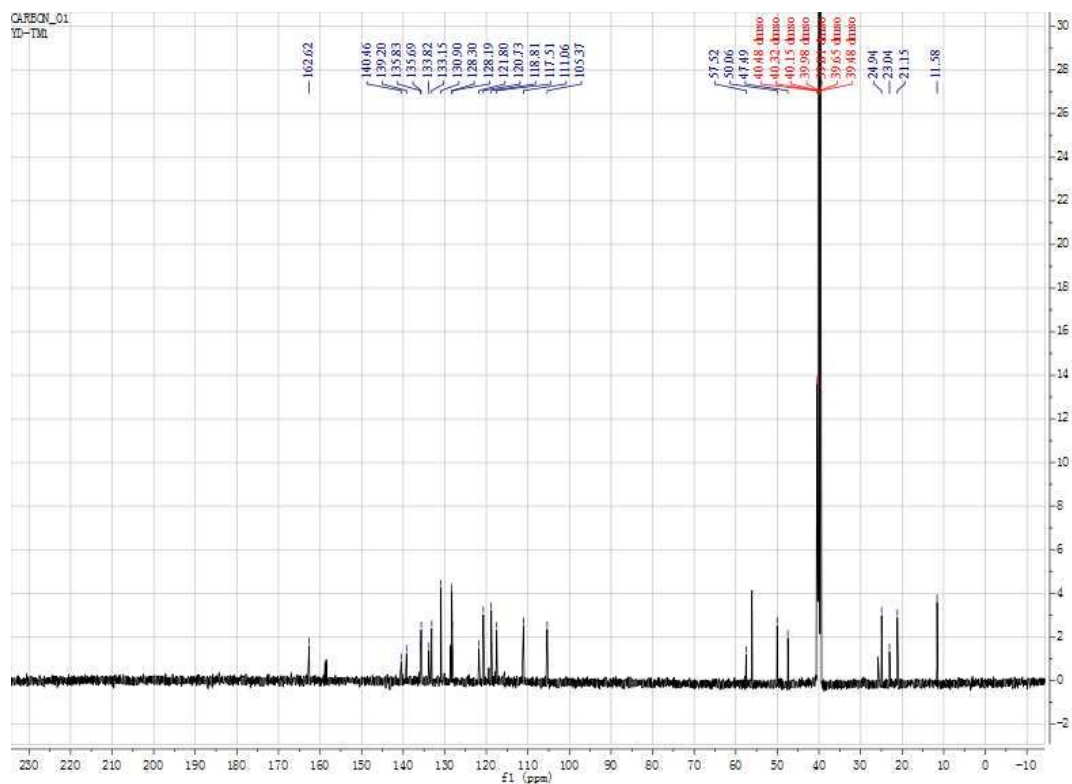

$^{13}\text{C}$ -NMR of 26c

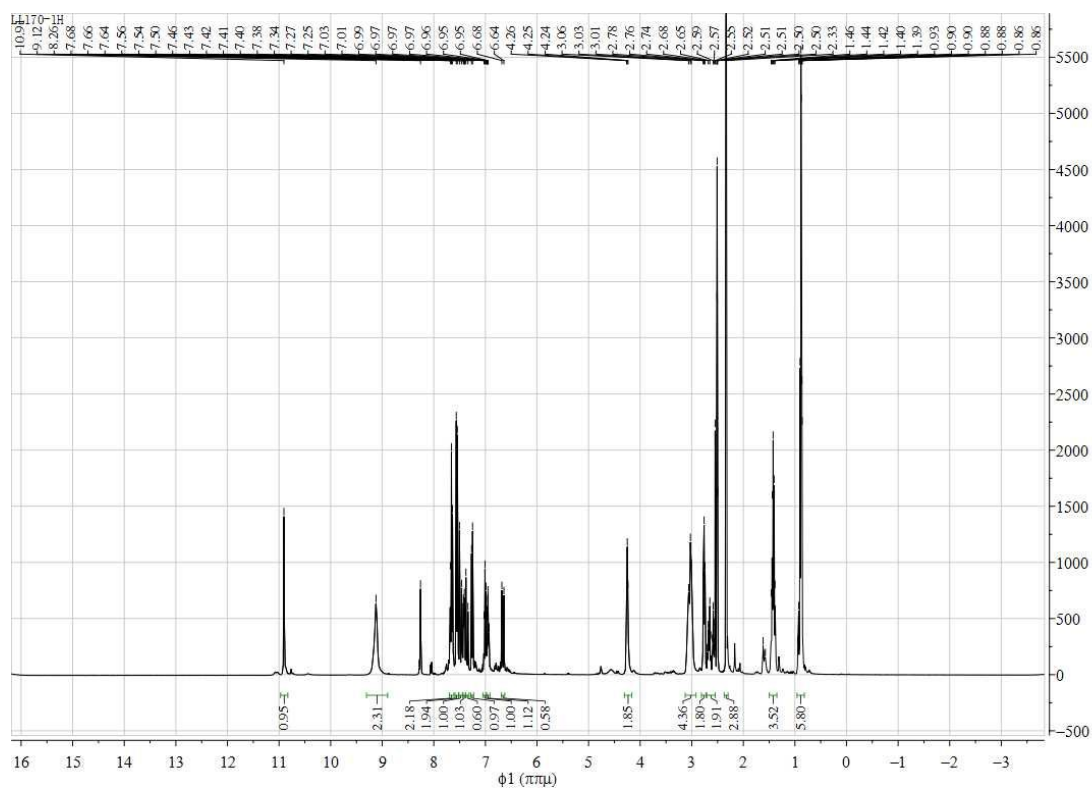

$^1\text{H}$ -NMR of 28b

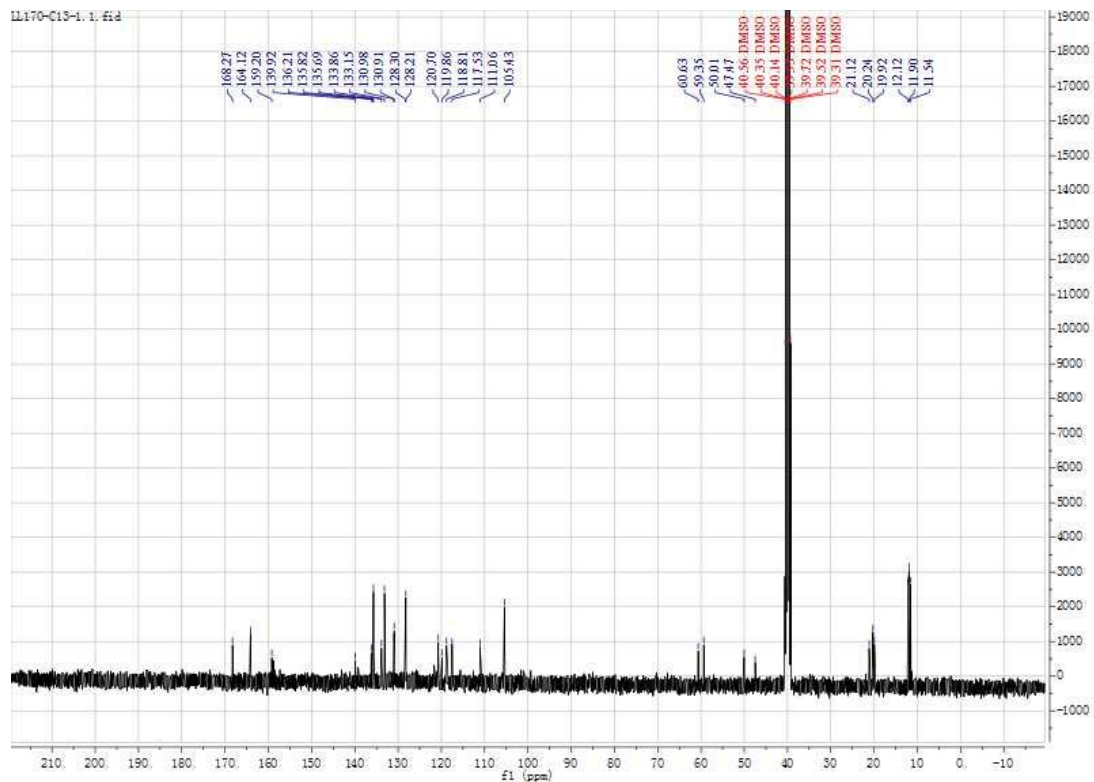

<sup>13</sup>C-NMR of 28b

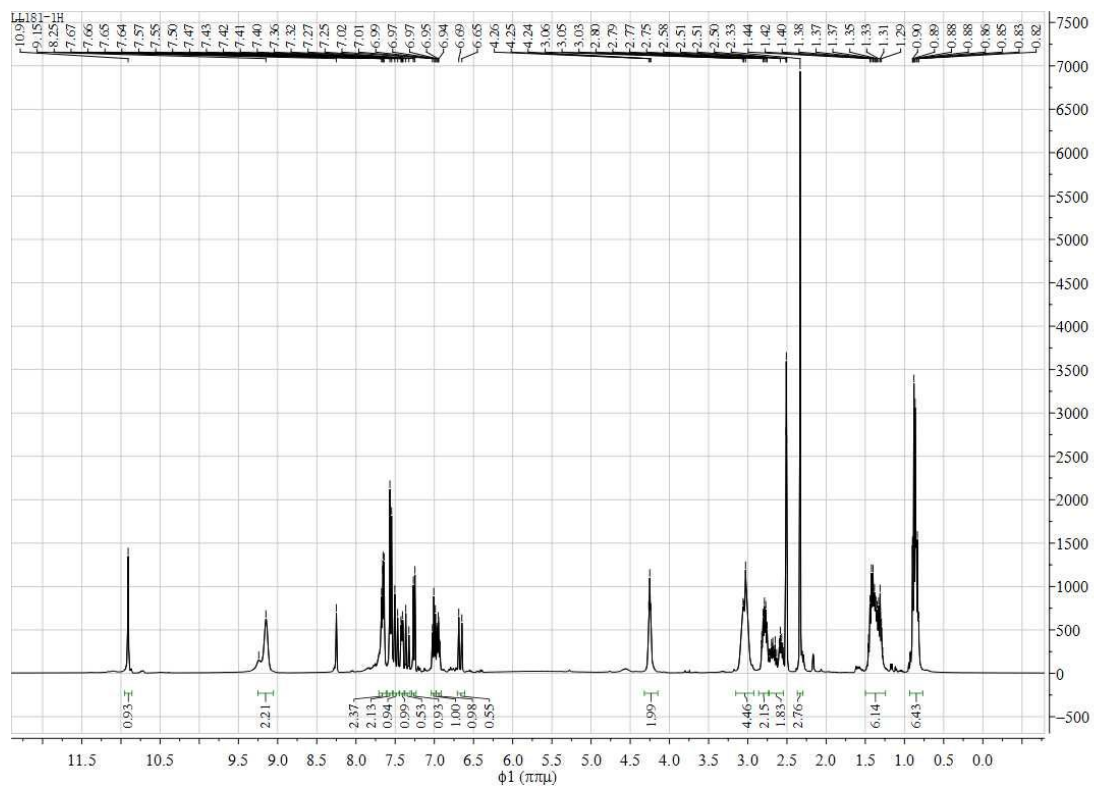

<sup>1</sup>H-NMR of 28c



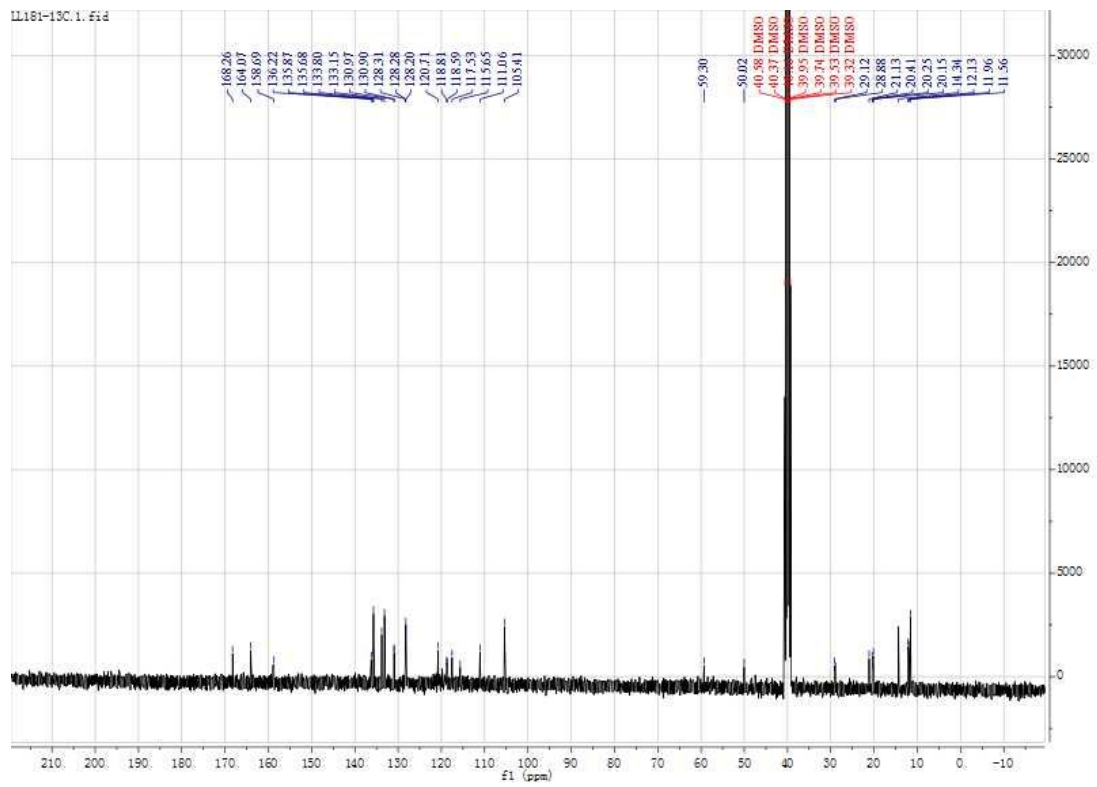

$^{13}\text{C-NMR}$  of 28c

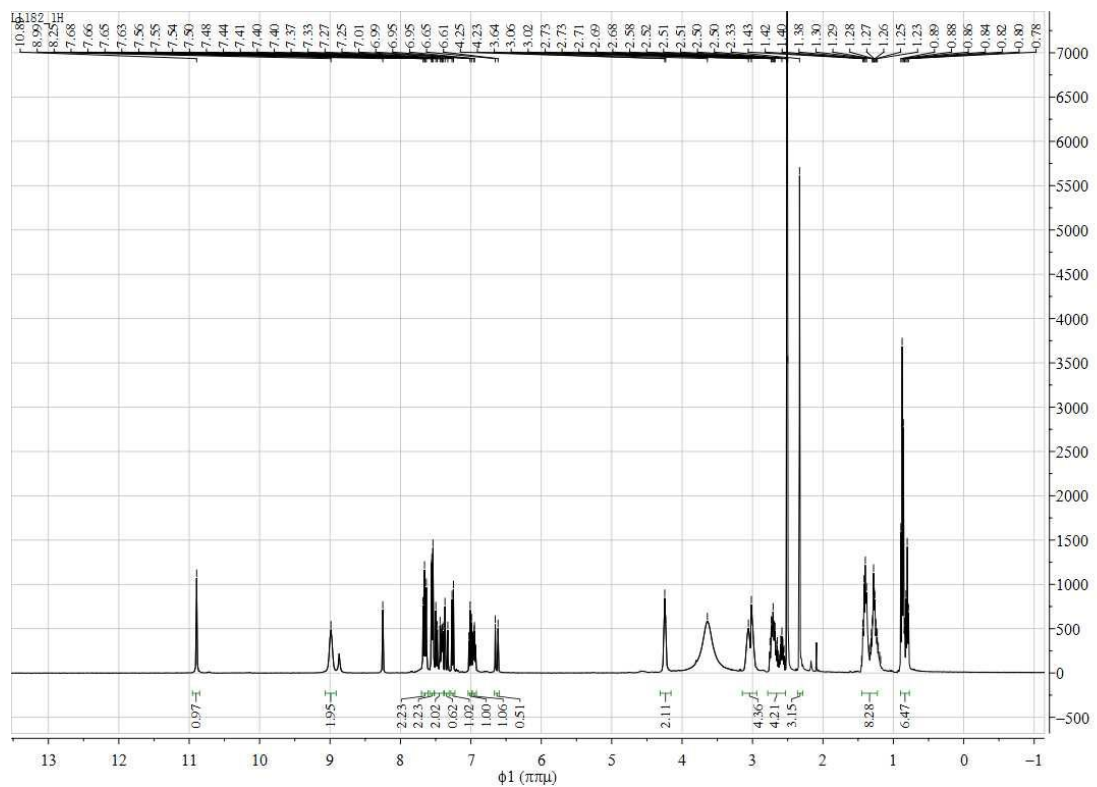

$^1\text{H-NMR}$  of 28d

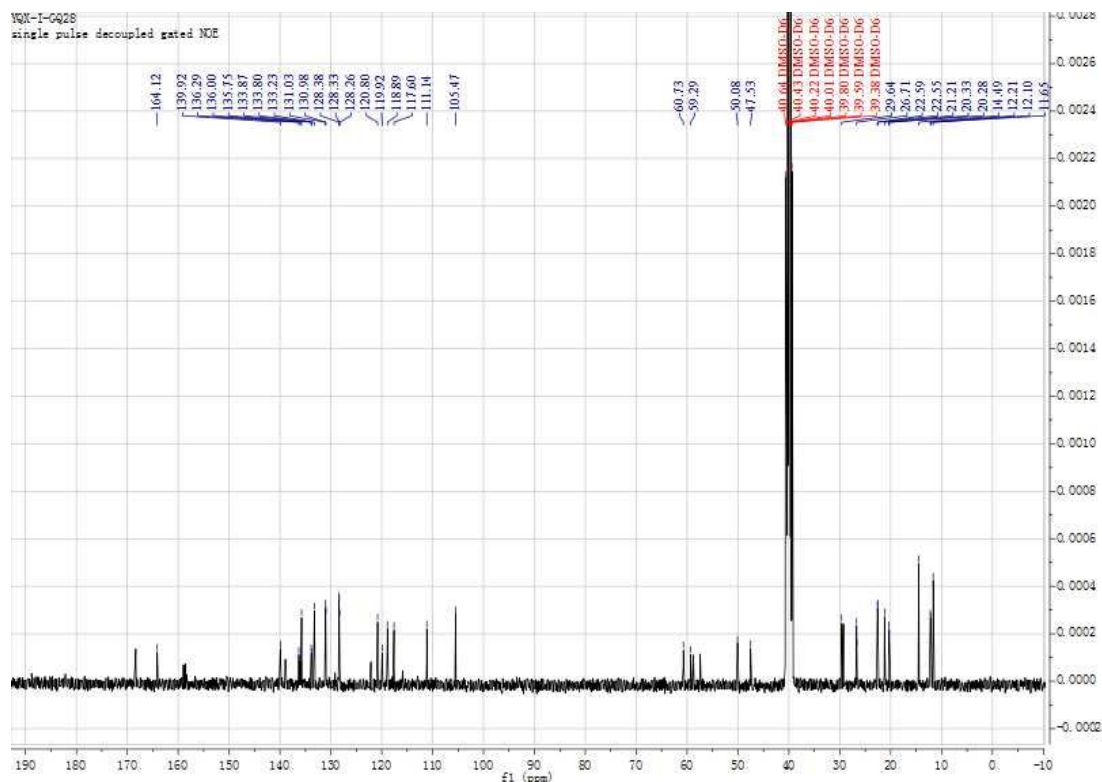

<sup>13</sup>C-NMR of 28d

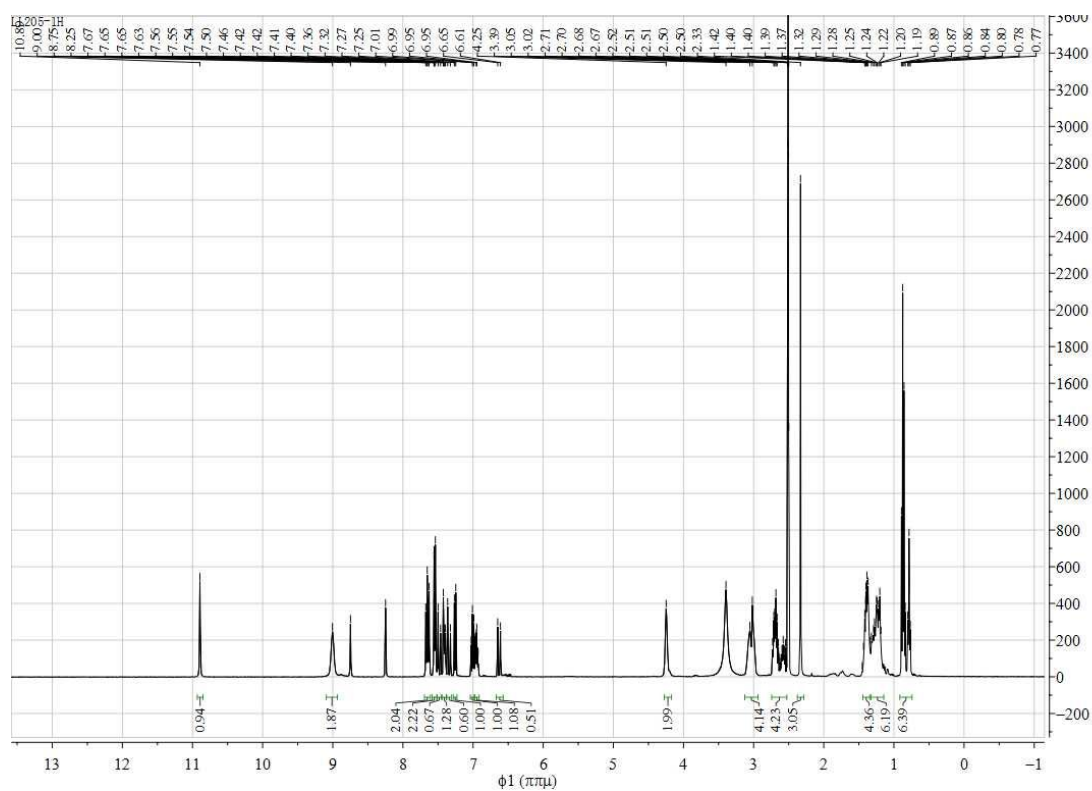

<sup>1</sup>H-NMR of 28e

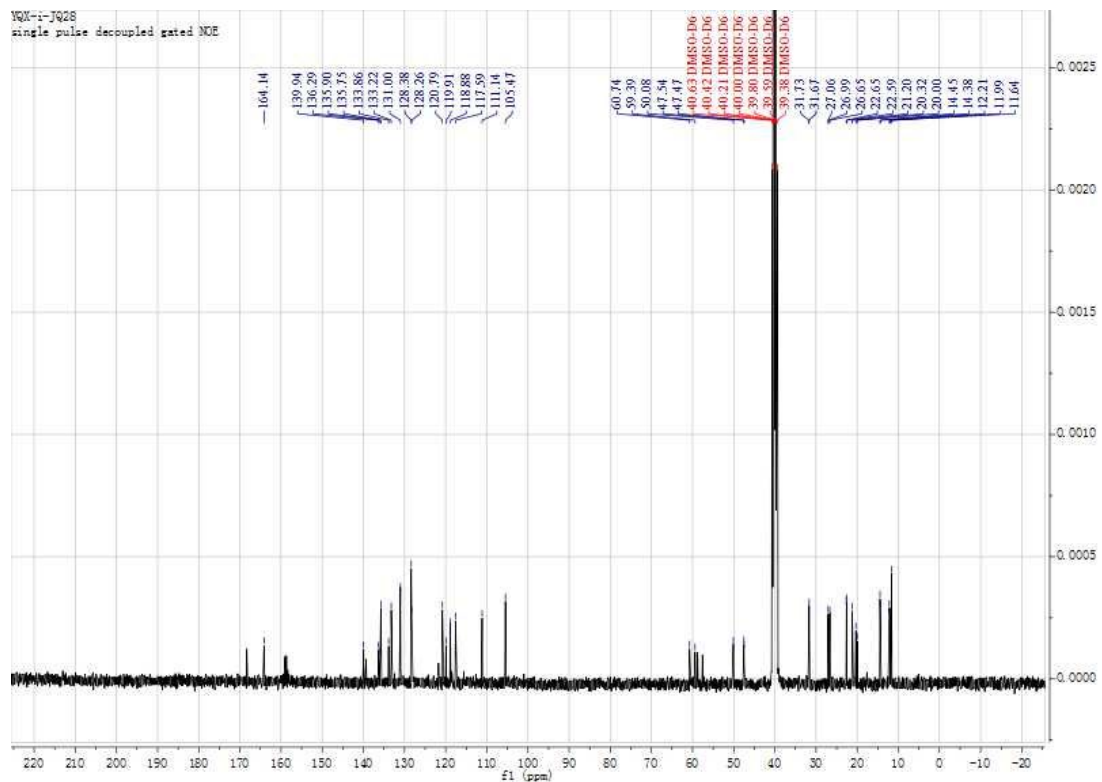

$^{13}\text{C-NMR}$  of 28e

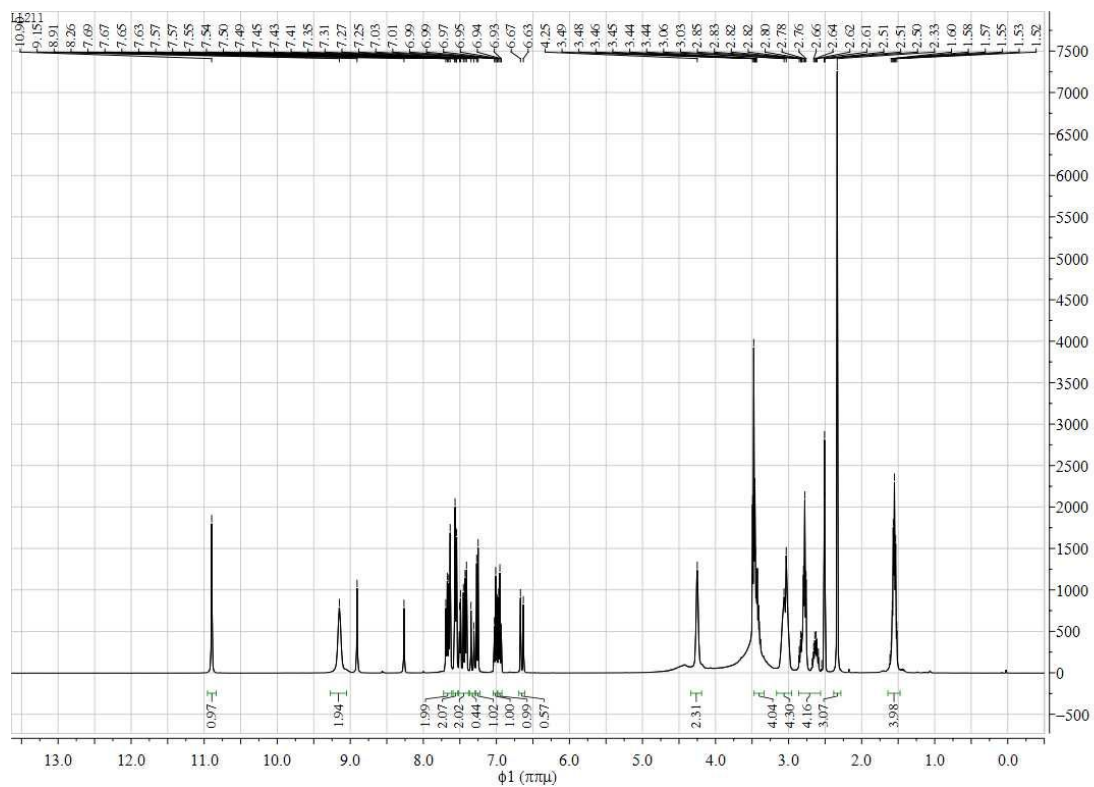

$^1\text{H-NMR}$  of 30

## HPLC traces and purity of the target compounds

All target compounds were at least 95% pure as confirmed via UV detection of ESI LCMS, performed on an Waters e2695 HPLC instrument using an XBridge C18 column (5 $\mu$ m, 4.6 mm  $\times$  150 mm) using a gradient of water/methanol plus 0.1% formic acid (0-1 mins from 0-50% methanol, 1-12 mins from 50% to 100% methanol, 12-14 min to 0% methanol, and maintained at 0% for 1 minute).

12a

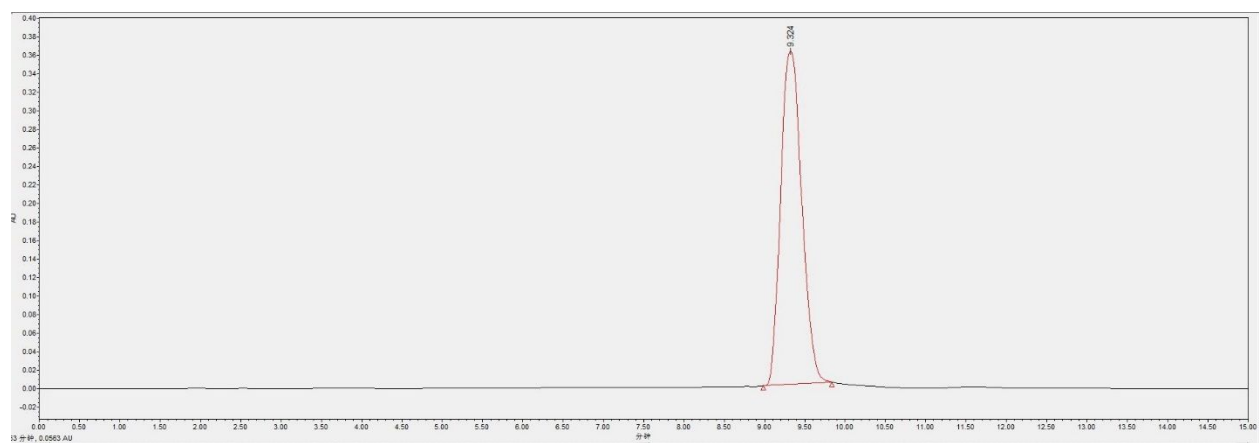

Purity: 100%

13a

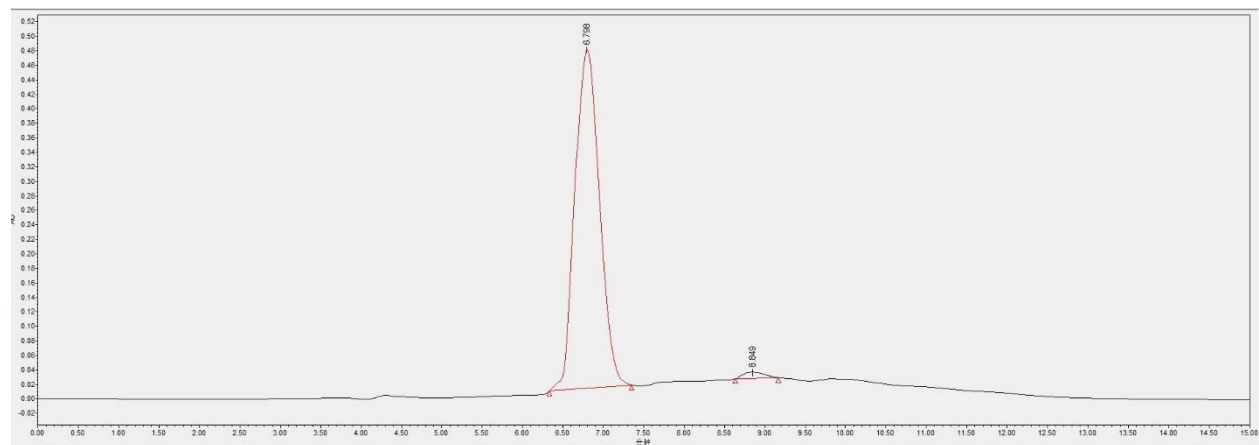

Purity: 98.5%

13b

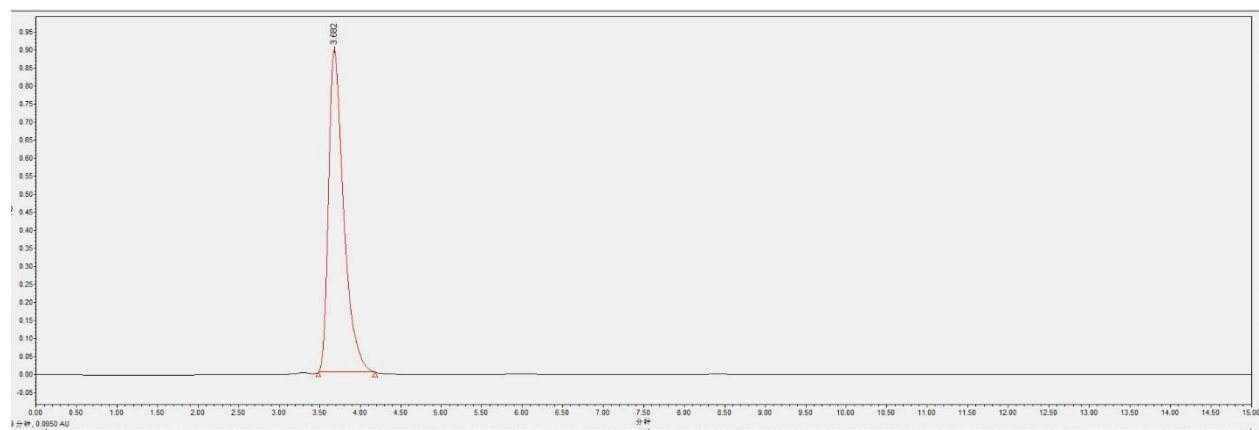

Purity: 100%  
13c

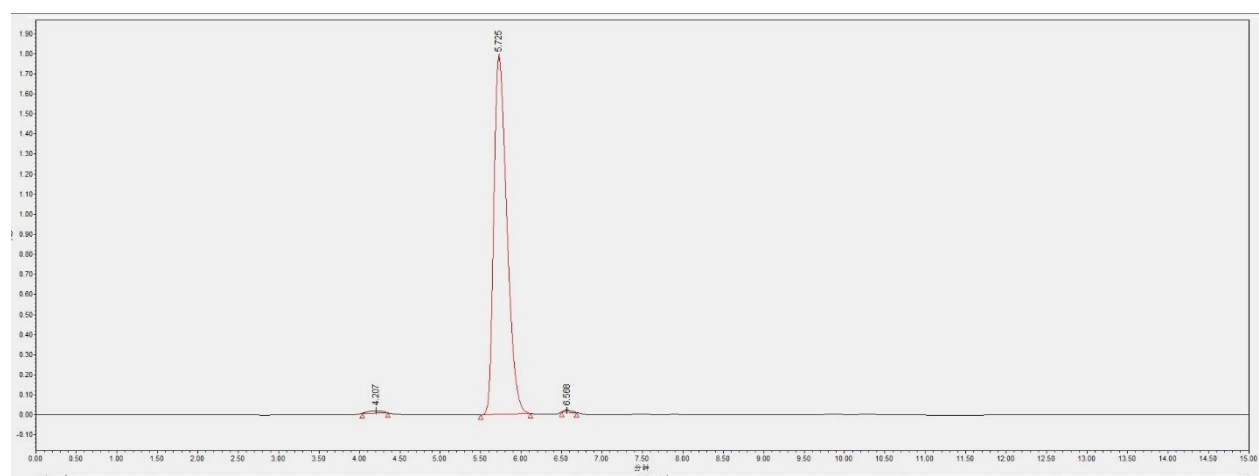

Purity: 99.0%  
13d

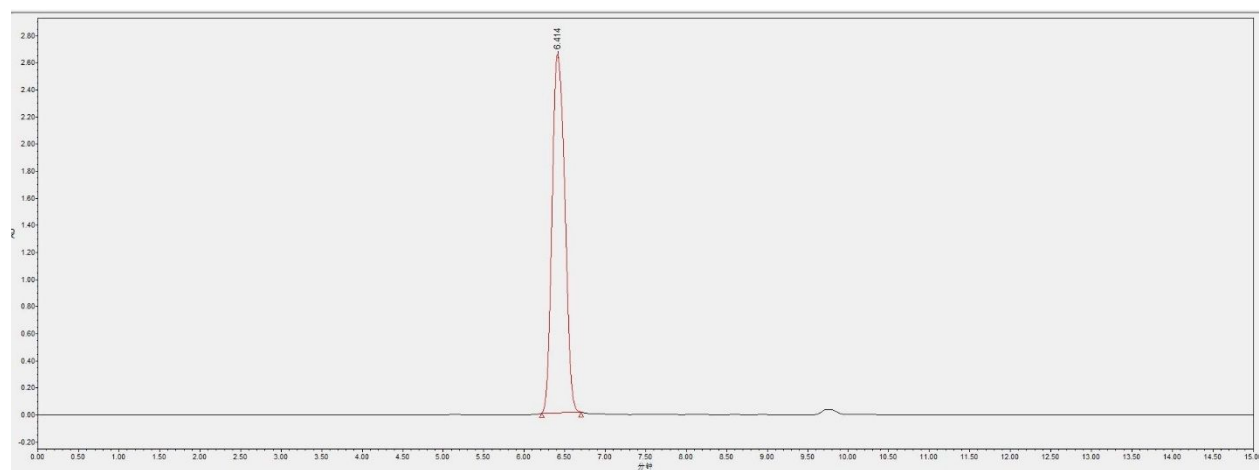

Purity: 100%  
15a

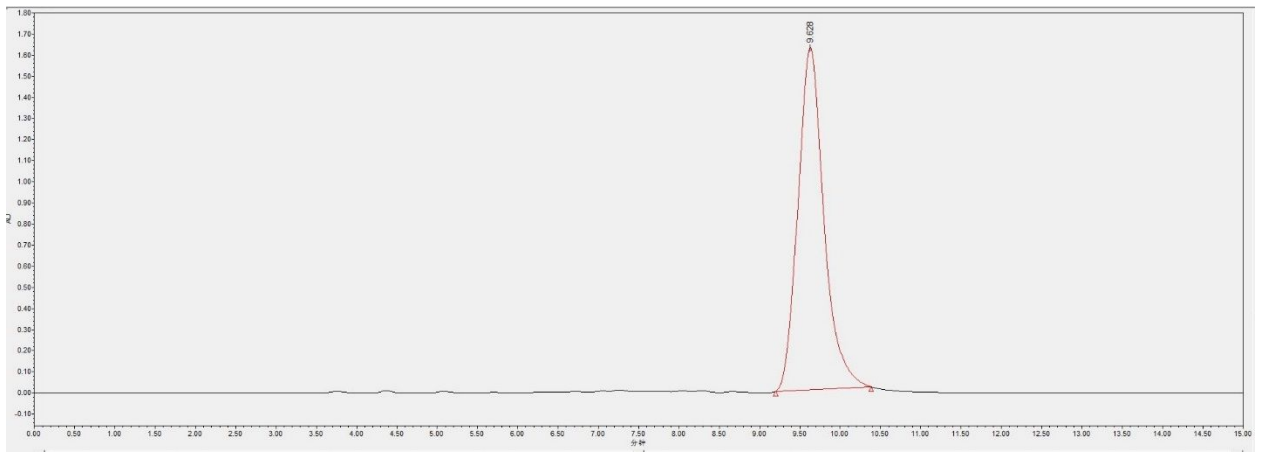

Purity: 100%  
15b

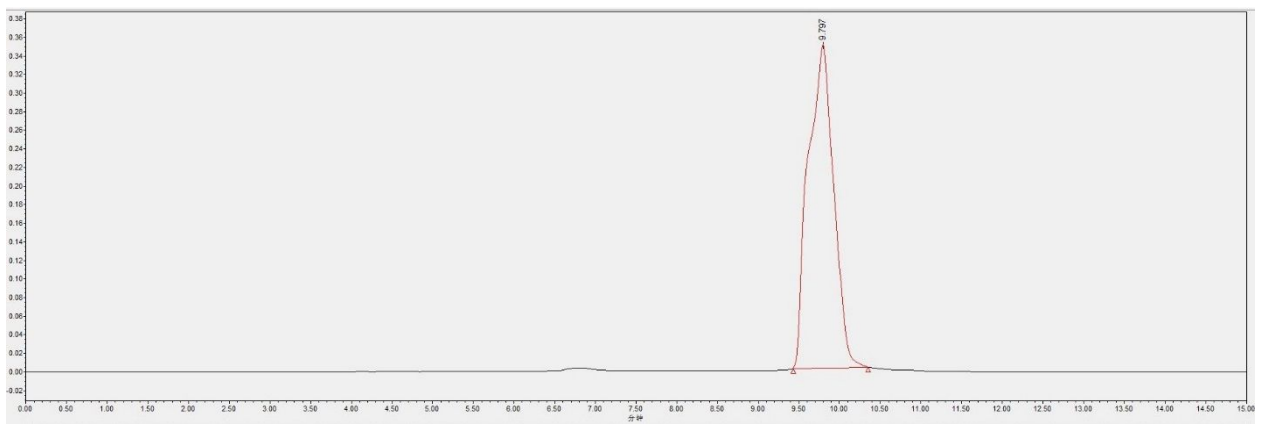

Purity: 100%  
15c

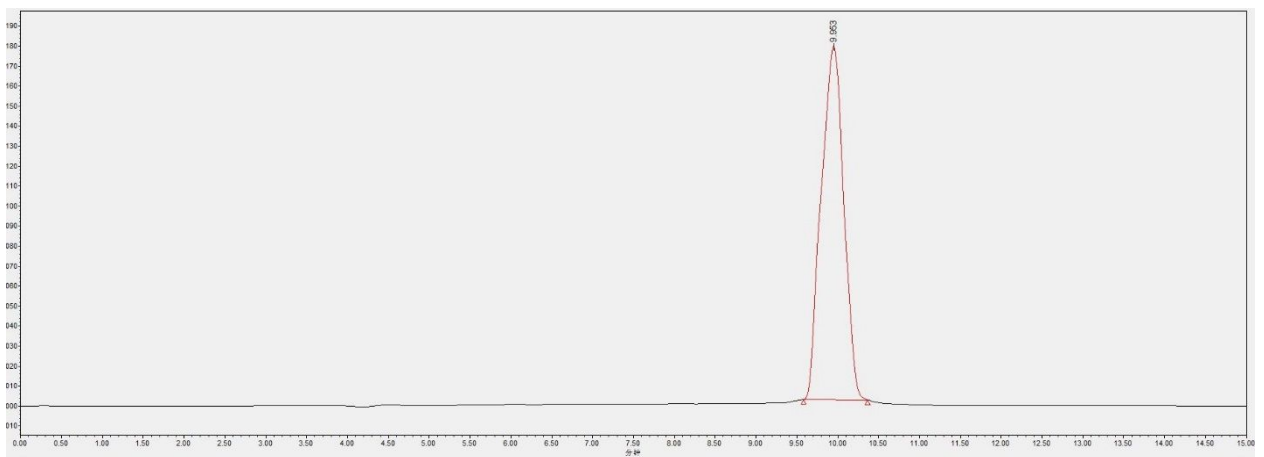

Purity: 100%  
16a

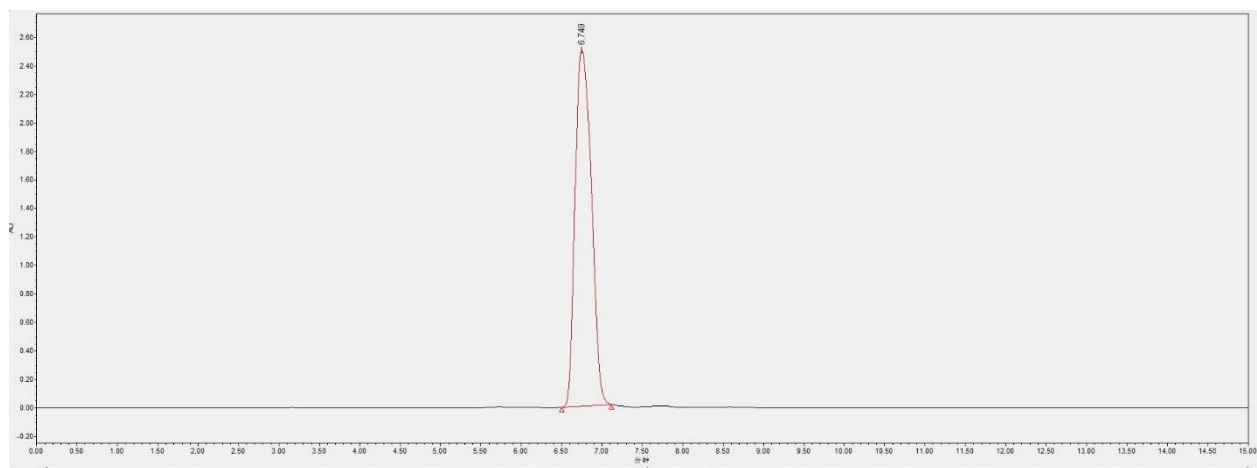

Purity: 100%  
16b

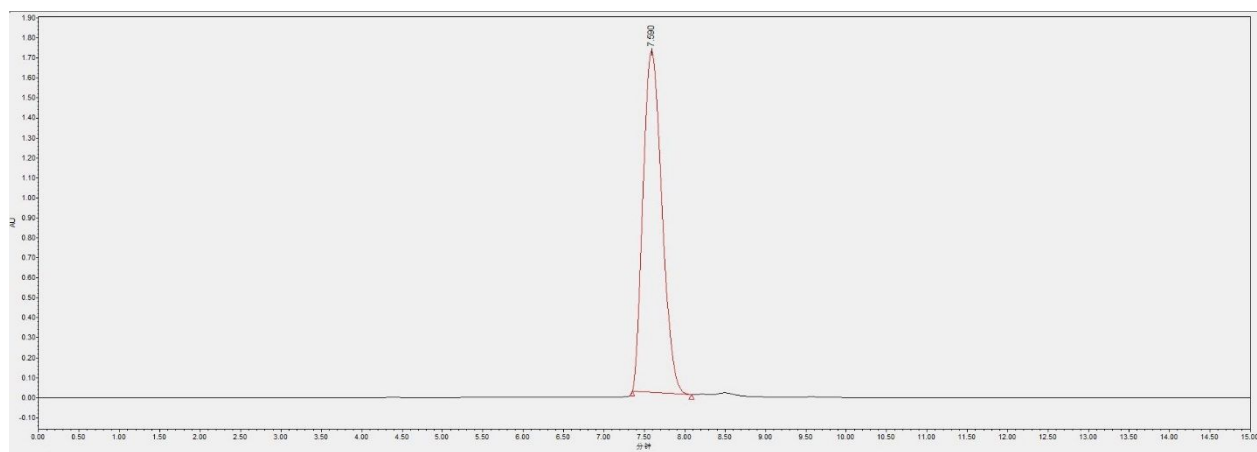

Purity: 100%  
16c

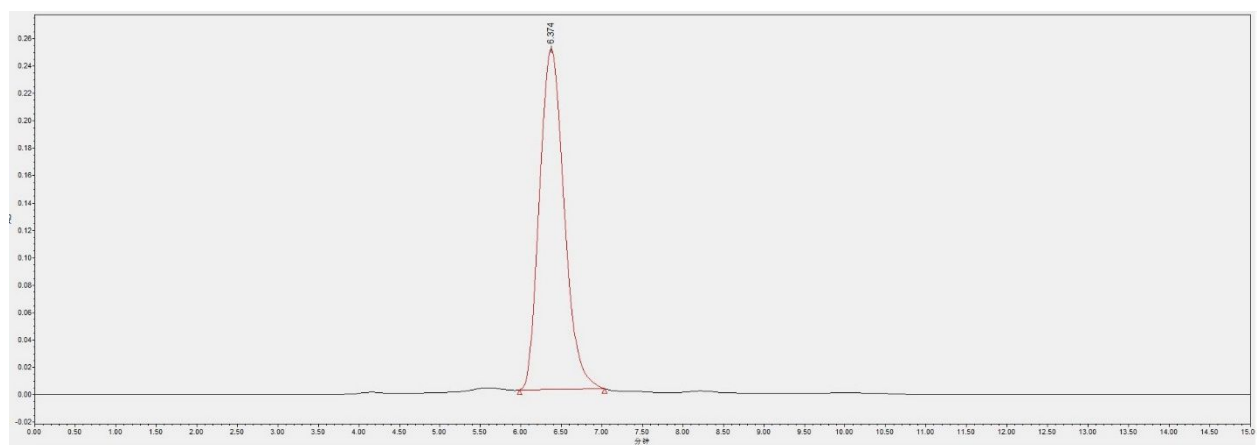

Purity: 100%  
24a

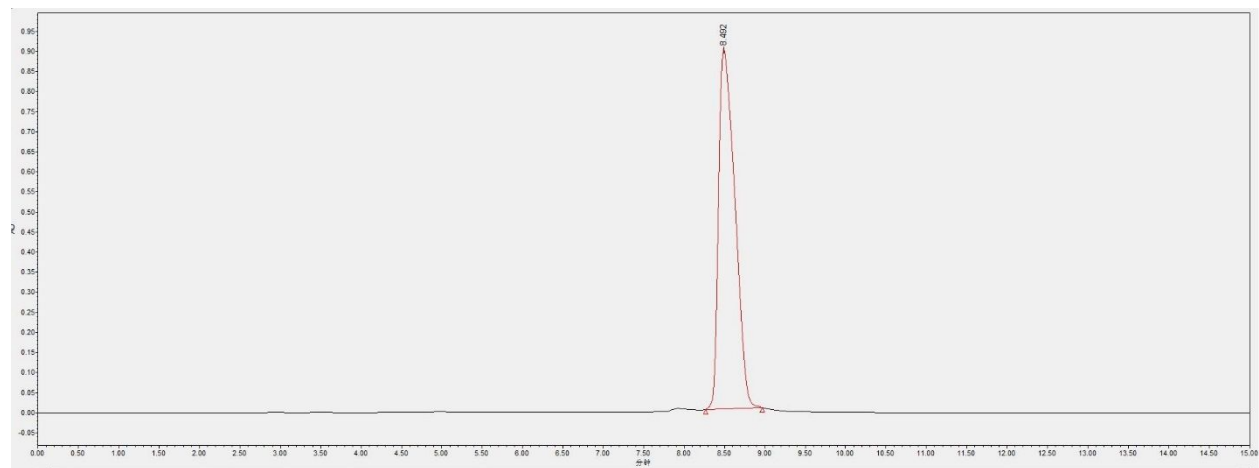

Purity: 100%  
24b

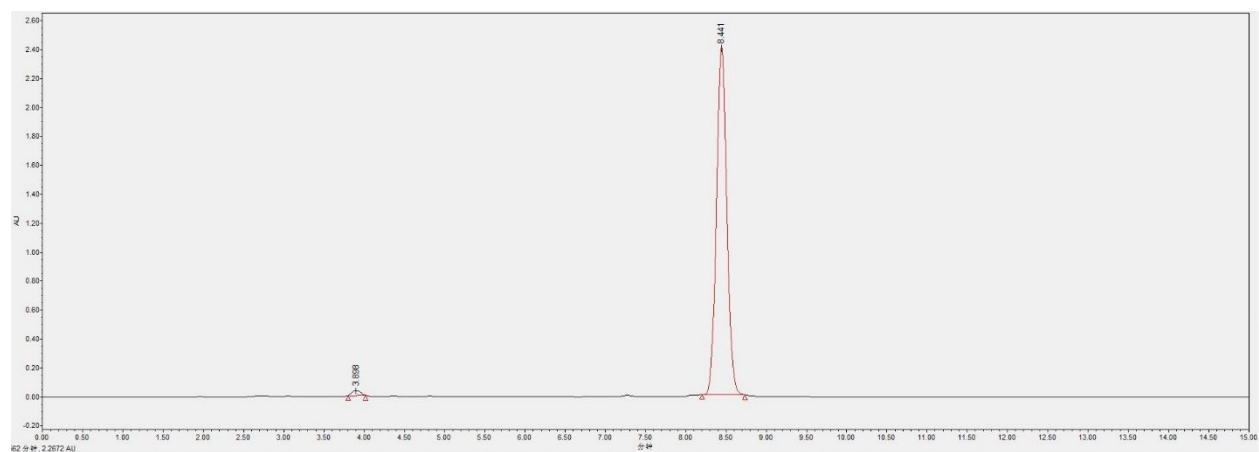

Purity: 98.7%  
24c

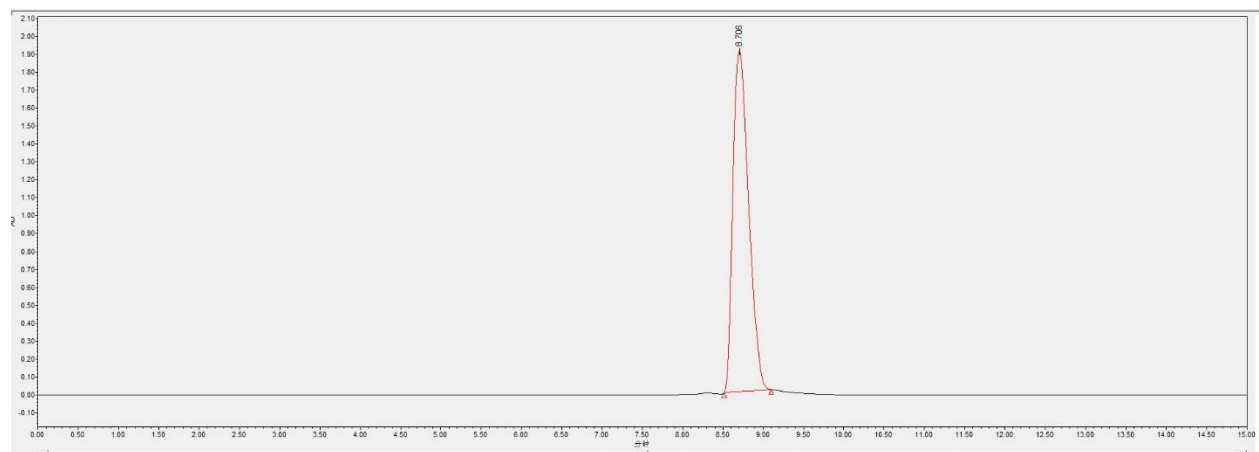

Purity: 100%  
26a



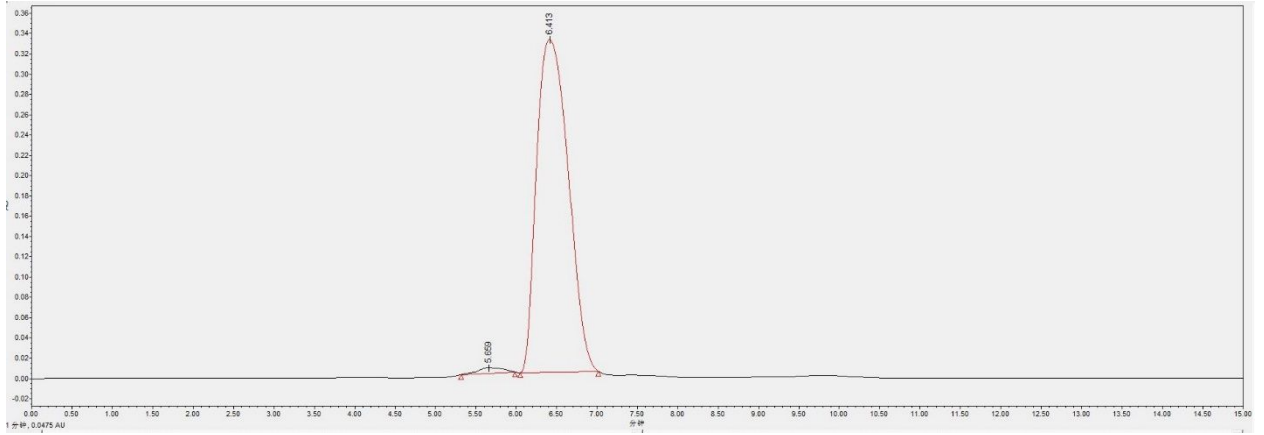

Purity: 98.7%

26b

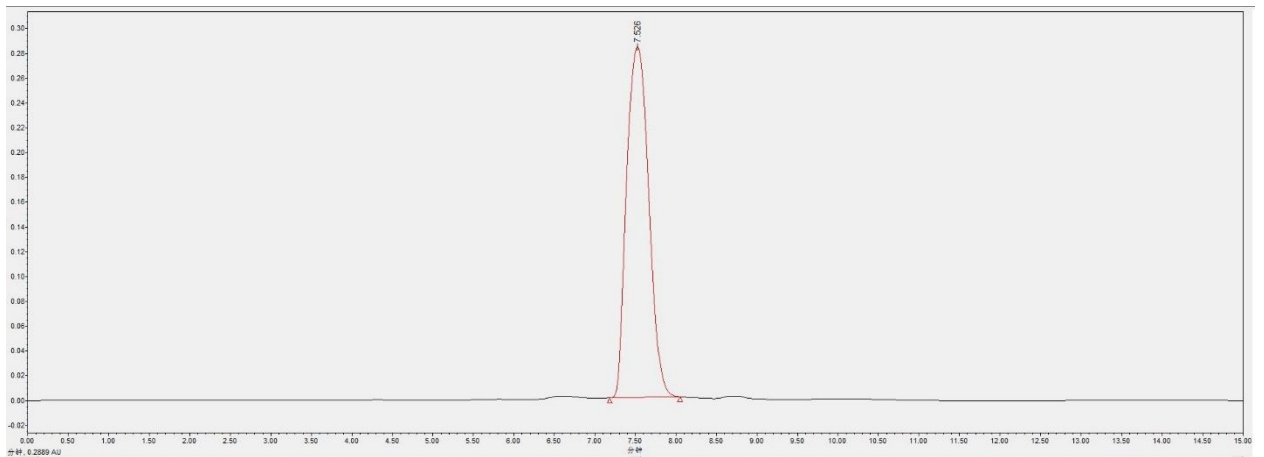

Purity: 100%

26c

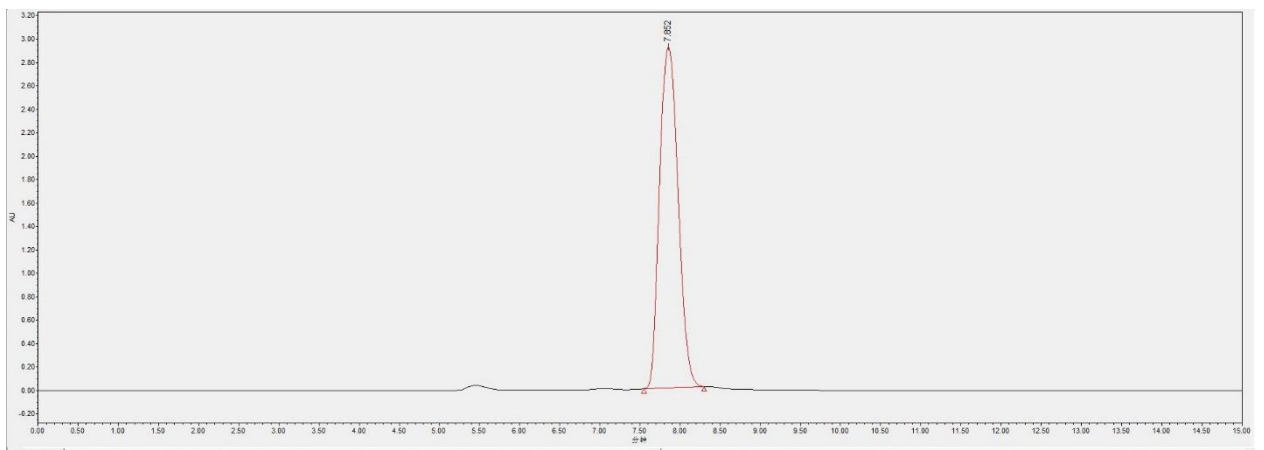

Purity: 99.5%

28a

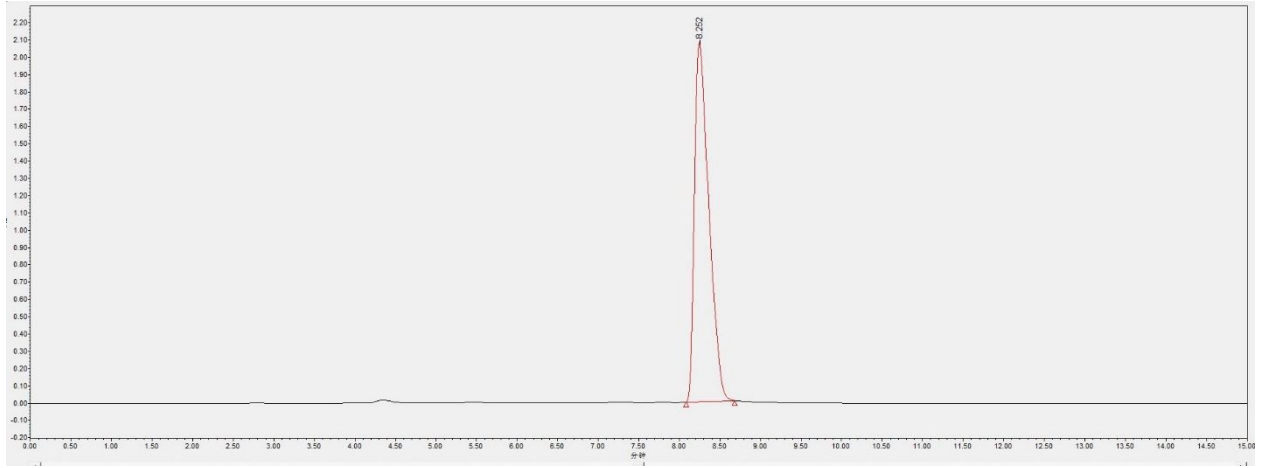

Purity: 100%  
28b

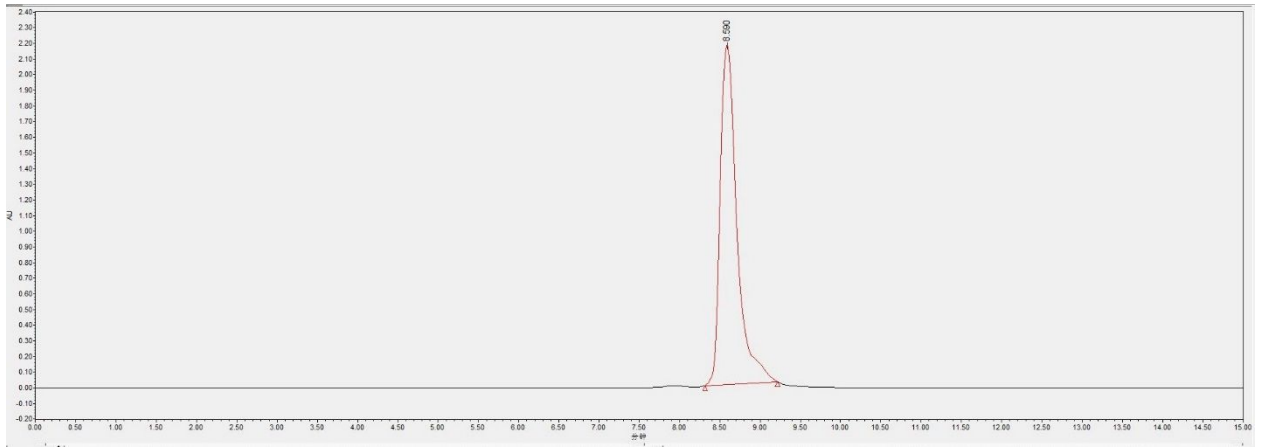

Purity: 100%  
28c

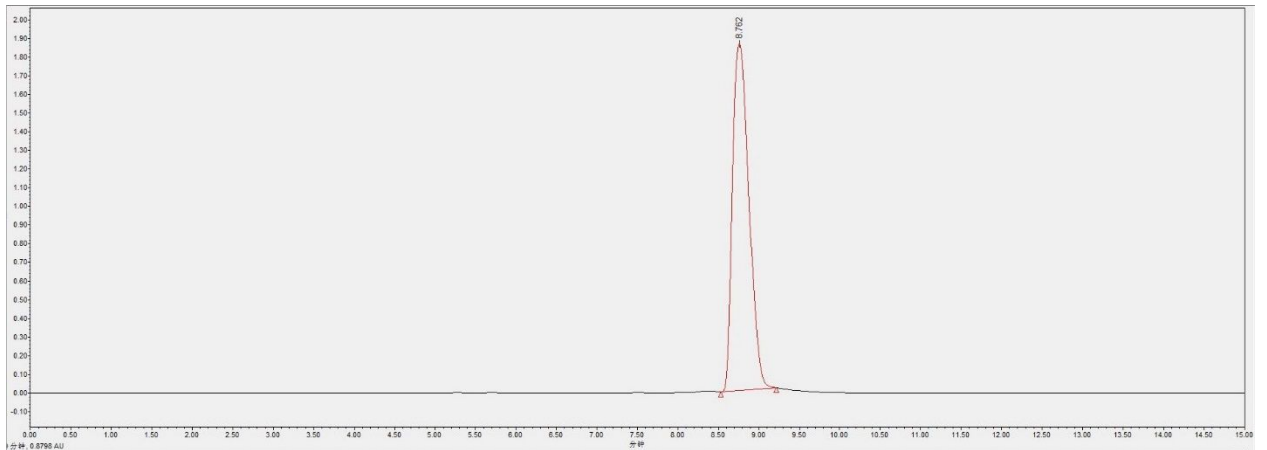

Purity: 100%  
28d

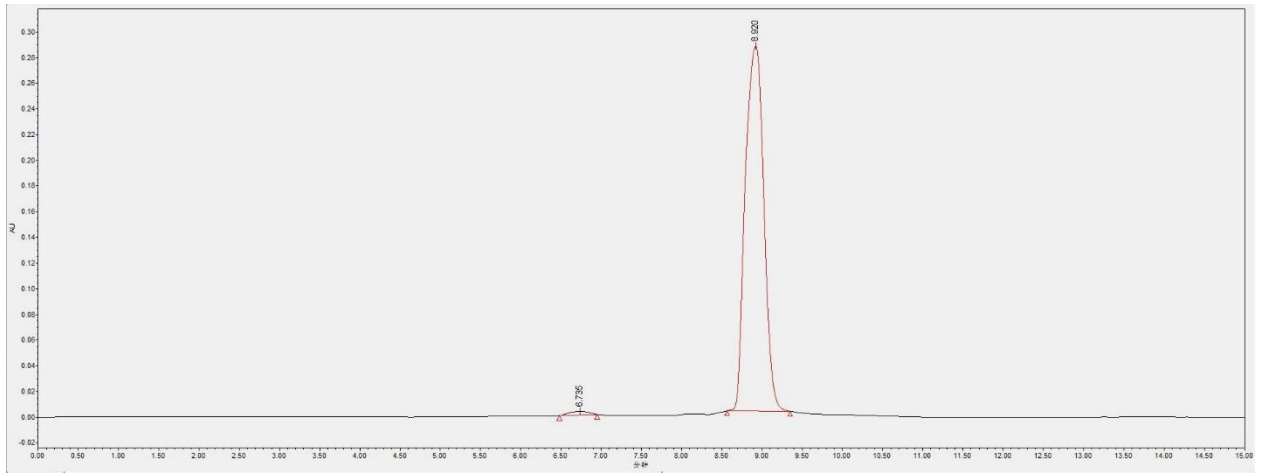

Purity: 99.4%  
28e

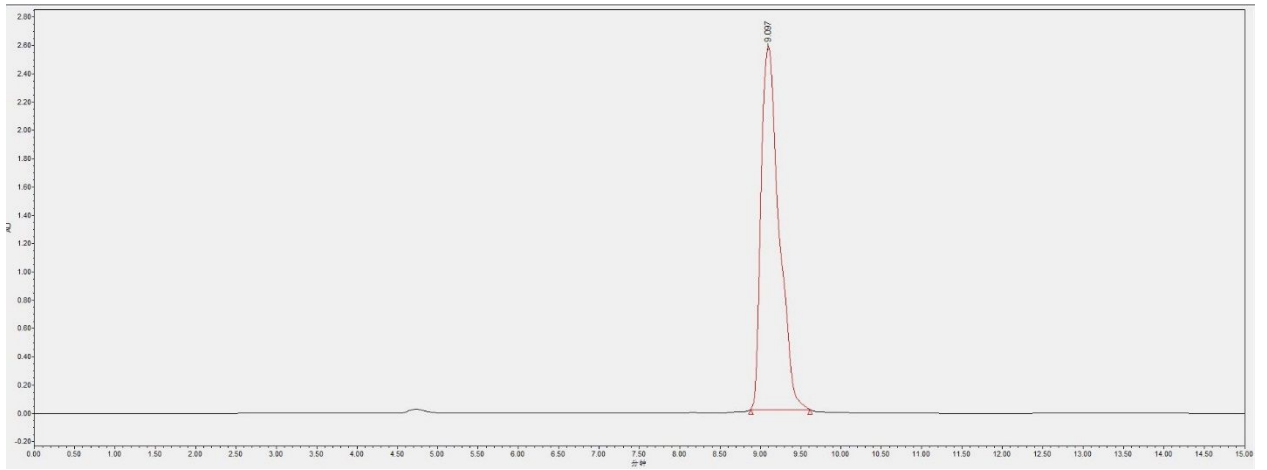

Purity: 100%  
30

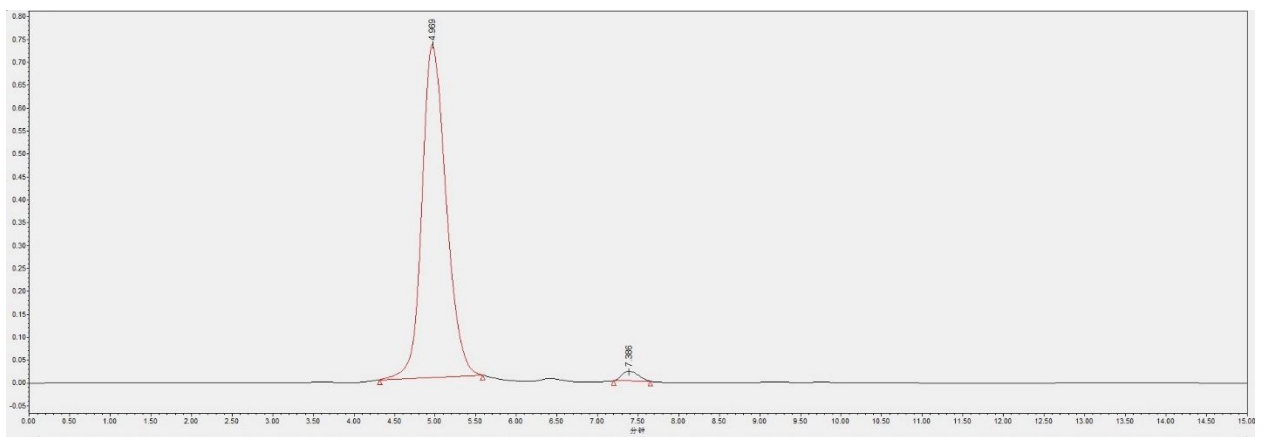

Purity: 98.0%
